1                    **Cis acting variation is common, can propagates across multiple**  
2                    **regulatory layers, but is often buffered in developmental**  
3                    **programs**

4                    Swann Floc'hlay<sup>1,\*</sup>, Emily Wong<sup>2,3\*</sup>, Bingqing Zhao<sup>4,\*</sup>,  
5                    Rebecca R. Viales<sup>4</sup>, Morgane Thomas-Chollier<sup>1,5</sup>, Denis Thieffry<sup>1</sup>,  
6                    David A. Garfield<sup>4,†</sup>, and Eileen EM Furlong<sup>4,†</sup>

7  
<sup>1</sup>Institut de Biologie de l'ENS (IBENS), École Normale Supérieure, CNRS, INSERM,  
Université PSL, 75005 Paris, France.

<sup>2</sup>Molecular, Structural and Computational Biology Division, Victor Chang Cardiac Research  
Institute, Darlinghurst, New South Wales, Australia

<sup>3</sup>School of Biotechnology and Biomolecular Sciences, UNSW Sydney, Kensington, New  
South Wales, Australia

<sup>4</sup>European Molecular Biology Laboratory (EMBL), Genome Biology Unit, D-69117,  
Heidelberg, Germany

<sup>5</sup>Institut Universitaire de France (IUF), 75005 Paris, France.

\*These authors contributed equally, listed alphabetically

†To whom correspondence should be addressed

E-mails            [dagarfield@gmail.com](mailto:dagarfield@gmail.com), [furlong@embl.de](mailto:furlong@embl.de)

8                    Telephone        +49 6221 3878416

9                    Fax                +49 6221 3878166

**Running title:** Dissecting the functional impact of DNA variation

**Keywords:** Natural sequence variation, developmental enhancers, F1 embryos, open  
chromatin, transcription, gene regulation, selection

## Abstract

10       Precise patterns of gene expression are driven by interactions between transcription factors,  
11 regulatory DNA sequence, and chromatin. How DNA mutations affecting any one of these  
12 regulatory ‘layers’ is buffered or propagated to gene expression remains unclear. To address  
13 this, we quantified allele-specific changes in chromatin accessibility, histone modifications, and  
14 gene expression in F1 embryos generated from eight *Drosophila* crosses, at three embryonic  
15 stages, yielding a comprehensive dataset of 240 samples spanning multiple regulatory layers.  
16 Genetic variation in *cis*-regulatory elements is common, highly heritable, and surprisingly  
17 consistent in its effects across embryonic stages. Much of this variation does not propagate to  
18 gene expression. When it does, it acts through H3K4me3 or alternatively through chromatin  
19 accessibility and H3K27ac. The magnitude and evolutionary impact of mutations is influenced  
20 by a genes’ regulatory complexity (*i.e.* enhancer number), with transcription factors being most  
21 robust to *cis*-acting, and most influenced by *trans*-acting, variation. Overall, the impact of  
22 genetic variation on regulatory phenotypes appears context-dependent even within the constraints  
23 of embryogenesis.

## 24 **Introduction**

25       The development of a multicellular organism requires the tight regulation of gene expression  
26 in both space and time to ensure that reproducible phenotypes are obtained across individuals and  
27 environmental conditions. DNA regulatory elements (*e.g.* promoters and enhancers) are essential  
28 to this process by integrating regulatory information from sequence-specific transcription factors  
29 (TFs), RNA polymerase II (Pol II), and other regulatory proteins to drive specific spatio-temporal  
30 patterns of expression during development. But while gene expression patterns are typically  
31 quite precise, the DNA regulatory elements that control such expression states are replete with  
32 genetic variation (mutations) that can impact transcriptional regulation at multiple levels  
33 including TF binding (Kasowski et al. 2010; Spivakov et al. 2012; Behera et al. 2018), chromatin  
34 state (Waszak et al. 2015), transcriptional start site usage (Schor et al. 2017), gene expression  
35 levels (Garfield et al. 2013; Battle et al. 2015), and transcript isoform diversity (Cannavo et al.  
36 2017). As a result, genetic variation in regulatory elements can contribute to variation in disease  
37 susceptibility among individuals (Epstein 2009; Lowe and Reddy 2015) and to evolutionary  
38 change between species (Wittkopp and Kalay 2011), by impacting higher-level phenotypes.

39       Although regulatory mutations can have large effects, many behave effectively neutrally,  
40 making it challenging to predict which genetic variants will have an impact. Part of the difficulty  
41 comes from the general lack of knowledge about which regions of non-coding DNA have  
42 regulatory (not just biochemical) function. An additional challenge is the apparent robustness of  
43 gene regulatory networks. At least within a laboratory context, whole sections of regulatory  
44 DNA can be removed with little apparent impact on phenotype or fitness (Ahituv et al. 2007),  
45 and evolutionarily divergent regulatory sequences are often swapped between species with few  
46 detectable changes in gene expression (Borok et al. 2010). These studies demonstrate that  
47 developmental systems have the ability to compensate or “buffer” the effects of regulatory  
48 mutations, *e.g.* via compensation by other regulatory elements with partially overlapping  
49 activities (Hong et al. 2008; Frankel et al. 2010; Cannavo et al. 2016).

50       The complex relationship between DNA sequences and regulatory function further  
51 complicates our understanding of how mutations can impact gene regulation. For example,  
52 mutations affecting TF binding motifs can have a large impact on chromatin accessibility, Pol II  
53 occupancy, histone modifications and gene expression (Kircher et al. 2019). But in some

54 contexts/tissues, TF binding is driven by collective processes that can include protein-protein as  
55 well as protein-DNA interactions, such that mutations affecting a single TF motif may not  
56 substantially affect TF recruitment (Junion et al. 2012; Doitsidou et al. 2013; Uhl et al. 2016;  
57 Khoueiry et al. 2017). Moreover, many sequence variants affecting TF occupancy *in vivo* lie  
58 outside the TF's binding motif, and are likely due to variation affecting the binding of co-  
59 occurring factors (Kasowski et al. 2010; Zheng et al. 2010; Reddy et al. 2012) or an overall  
60 change in DNA shape (Lu and Rogan 2018). To make matters more complex, enhancer output is  
61 not a strict function of all TF's occupancy – enhancers often contain binding sites for multiple  
62 factors with redundant input, and in some cases, different combinations of TFs can produce the  
63 same expression output (Brown et al. 2007; Zinzen et al. 2009; Khoueiry et al. 2017). Even in  
64 cases where an enhancer's activity is abolished by mutations, the gene's expression may not be  
65 affected, as genes often have many enhancers with partially overlapping activity, which can  
66 buffer the functional impact of genetic variation impacting a single enhancer (Hong et al. 2008;  
67 Frankel et al. 2010; Cannavo et al. 2016). With a few exceptions (Bullaughay 2011), this  
68 complex genotype-to-phenotype relationship cannot be modelled using regulatory sequence  
69 information alone, but rather must be evaluated empirically (Khoueiry et al. 2017).

70 Allelic-specific data provides a unique opportunity to study the molecular mechanisms of *cis*-  
71 acting variation and has uncovered multiple regulatory processes through which *cis*-acting  
72 variation impacts transcriptional control (Kilpinen et al. 2013; Chen et al. 2016). F1 crosses of  
73 inbred strains provide an elegant method to determine the contribution of both *cis* and *trans*  
74 variation by overcoming the limits of genetic variation between trios and the general lack of  
75 statistical power to interrogate *trans*-acting variation using population data (Wittkopp et al. 2004;  
76 Tirosh et al. 2009; Goncalves et al. 2012; Wong et al. 2017). Taking advantage of this F1 design,  
77 we set out to better understand how natural sequence variation impacts gene regulation during  
78 embryonic development. We collected *Drosophila* F1 hybrid embryos and quantified allele-  
79 specific changes in open chromatin (ATAC-Seq), enhancer and promoter activity (using  
80 H3K27ac or H3K4me3 & H3K27ac ChIP-Seq as proxies, respectively), and gene expression  
81 (RNA-seq). Our half-sibling design of F1 embryos was generated by crossing males from eight  
82 genetically distinct, wild-derived isogenic lines from the *Drosophila* Genetic Reference Panel  
83 (DGRP) (Mackay et al. 2012) to females from a common, laboratory-derived isogenic reference  
84 strain. In addition to having practical advantages for conducting large scale crosses, as described

85 below, the use of a common female line allowed us to evaluate the impact of regulatory  
86 mutations while controlling for maternal effects, which can contribute disproportionately to  
87 variability in early developmental phenotypes (Lynch and Walsh 1998; Garfield et al. 2013). By  
88 collecting matched phenotypic measurements from two parental strains (*F0*), we also estimated  
89 the heritability of *cis*-acting mutations and the relative magnitude of *trans*-acting genetic  
90 variation that contributes to phenotypic divergence.

91 Overall, we find allelic variation in chromatin accessibility and histone marks to be common  
92 and significantly correlated between regulatory layers, with the effects of regulatory mutations  
93 being more strongly coupled at promoters than distal elements (putative enhancers). Using this  
94 genetic variation as a perturbation to gene regulation, we uncovered different mechanistic rules  
95 in the order of information flow during transcriptional regulation. Specific classes of genes, such  
96 as TFs, are in general more strongly buffered against the effects of this variation, which in turn  
97 reflects their patterns of inheritance and genetic architecture (having a greater proportion of *trans*  
98 and less additive heritability). In some cases, selection is driven to near fixation in gene  
99 expression (but interestingly not in upstream regulatory layers), affecting genes involved in  
100 environmental responses and pesticide resistance. Taken together, this comprehensive data set  
101 provides new insights into the functional impact of *cis*-regulatory DNA variation and how this is  
102 transmitted across different regulatory layers during embryogenesis, and how patterns of  
103 inheritance can influence the visibility of regulatory sequence variants to natural selection.  
104

## 105 **Results**

### 106 ***Quantifying gene expression and regulatory element activity in hybrid embryos***

107 We collected F1 hybrid embryos by mating eight genetically distinct inbred lines from the  
108 DGRP collection (Mackay et al. 2012) to females from a common maternal line (Fig. 1a). The  
109 resulting F1 panel contains an average of 567,412 SNPs per cross, and a total of 1,455,988  
110 unique SNPs covering a range of minor allele-frequencies and levels of conservation (phyloP  
111 scores) (Fig. S1a, Table S1).

112 The F1 embryos were collected at three important stages of embryogenesis: 2-4 hours after  
113 egg laying, consisting primarily of pre-gastrulation, unspecified embryos (mainly stage 5), 6-8  
114 hours (mainly stage 11), when major lineages within the three germ-layers are specified, and 10-  
115 12 hours (mainly stage 13), during terminal differentiation of tissue lineages (Fig. 1a). For each  
116 developmental stage, RNA-Seq, ATAC-Seq, and iChIP for H3K27ac and H3K4me3 (Buenrostro  
117 et al. 2013; Lara-Astiaso et al. 2014) were performed from the same collection of embryos (4  
118 measurements x 3 stages x 8 genotypes = 96 samples). In addition, we collected samples from  
119 the parents of one F1 genotype, forming a parent/offspring trio that allowed us to partition  
120 genetic differences between the parents into *cis* and *trans* (Wittkopp et al. 2004). All  
121 measurements were made in replicates from independent embryo collections to assess biological  
122 and technical variability, giving a total of 240 samples (192 F1 samples (96 x 2 replicates) + 48  
123 parental (4 measurement x 3 stages x 2 genotypes x 2 replicates)). Read counts were highly  
124 correlated between biological replicates, with median correlation coefficients of 0.98 for RNA,  
125 ATAC and histone data (Fig. S1b, Methods).

126 To define non-coding features, ATAC-Seq and ChIP-Seq reads from each cross were mapped  
127 to each parental line independently and the significant peaks merged to produce a combined set  
128 of common peaks used in subsequent comparisons across all genotypes. In total, we identified  
129 11,211 genes with detectable expression, 31,963 ATAC-Seq peaks, 19,769 H3K27ac peaks, and  
130 6,648 H3K4me3 peaks, active at one or more stages of embryogenesis (Table S2). Of these,  
131 93.9%, 95.8%, 95.2%, and 96.9%, respectively, contained at least one SNP that distinguishes  
132 maternal and paternal haplotypes in at least one line. The *CG12402* locus, a predicted ubiquitin-  
133 protein transferase, provides a good example of overall signal quality (Fig 1a). The gene has  
134 dynamic expression, transitioning from very low to high expression from 2-4 hours to 10-12

135 hours (Fig. 1a, RNA-seq), which is accompanied by quantitative changes in chromatin  
 136 accessibility, and to a lesser extent in histone modifications in its promoter-proximal region.

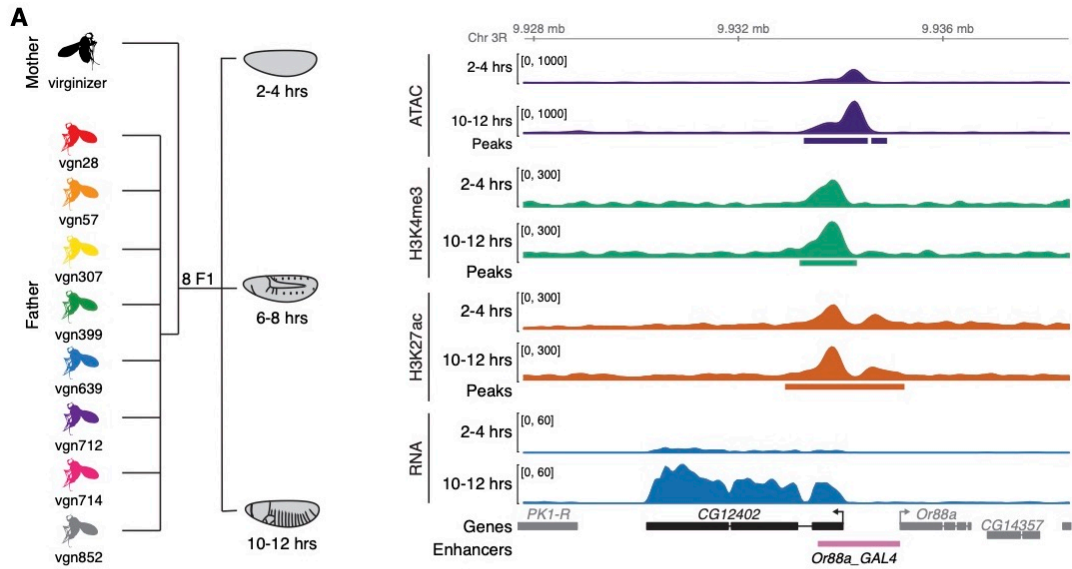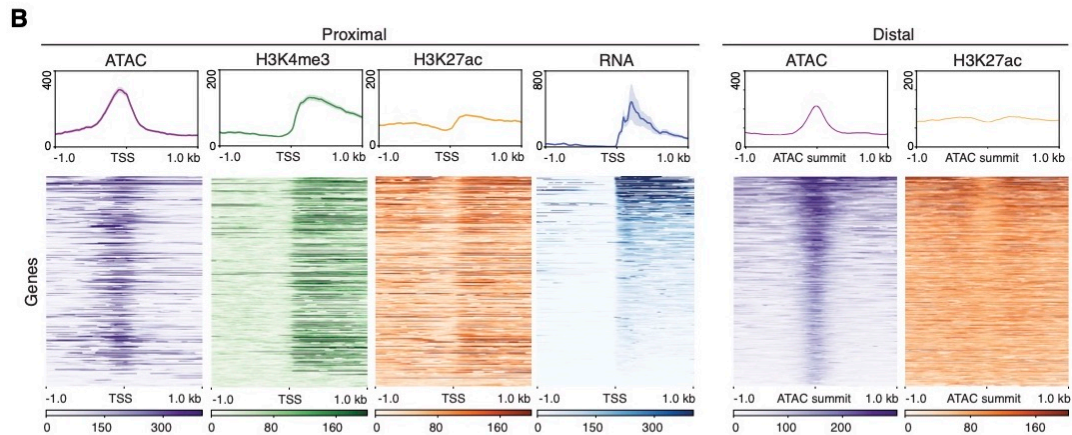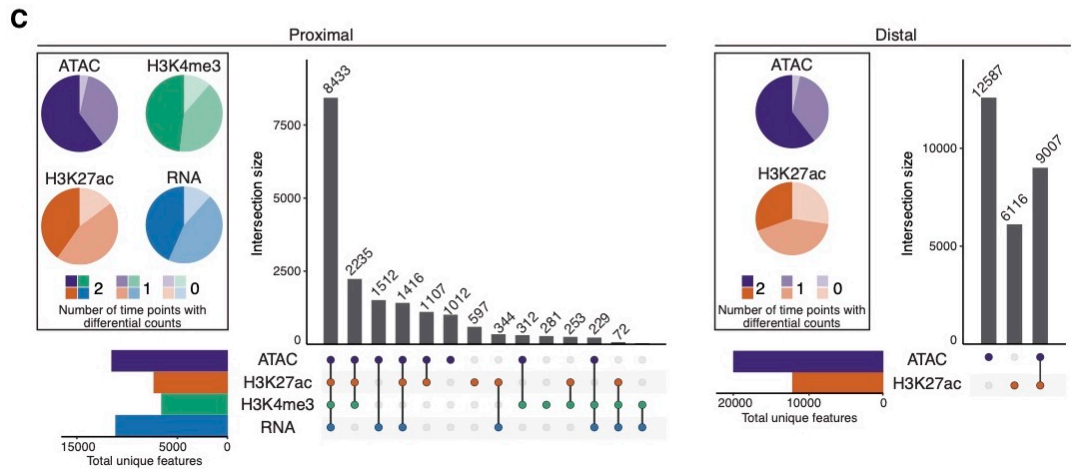



### Figure 1: Quantifying gene expression and regulatory element activity in hybrid embryos

**a.** Left: Experimental design and data structure. RNA-seq, ATAC-seq and iChIP of H3K4me and H3K27ac were performed on embryos of three developmental stages from 8 F1 hybrids with a common maternal line. Right: Genome browser overview for the *CG12402* gene locus showing all data for 2-4 hours and 10-12 hours for the genotype *vgn28*. Bottom track shows characterized enhancers (Kvon et al. 2014). **b.** Top panel shows density plots for read count signal from each data type for TSS proximal and distal regions (left and right, respectively). Shaded regions indicate the 95% confidence intervals. Plots are centered at the TSS for promoter proximal regions, and ATAC summits for distal regions. Bottom panel shows a heatmap representation of the data type corresponding to the density plots shown above where rows are sorted by mean RNA-seq and mean ATAC-seq signal. **c.** Upset plots show the colocalization of signal for proximal and distal regions (at peaks in regulatory regions and genes) for all four data types. Regions common between data types (filled circle) are joined by a vertical bar. Horizontal bar plots indicate the number of unique genes/features. Pie charts show the proportion of features with statistically different total read counts between time points (color indicates the number of times (0/1/2) the feature is differentially expressed).

137 To examine the regulatory relationships between these different signals, we divided the data  
138 into promoter proximal (within +/- 500 bp of an annotated transcriptional start site (TSS) or  
139 H3K4me3 peak) or distal (putative enhancer) elements. Looking globally at promoter proximal  
140 regions, all signals show the expected enrichment and distribution around the TSS (Fig 1b,  
141 proximal), demonstrating the quality of the data. The ATAC-seq signal, for example, is highest  
142 directly at the promoter, representing occupancy of the basal transcriptional machinery, while  
143 H3K27ac and H3K4me4 signals are highest at the +1 nucleosome, reflecting the predominantly  
144 unidirectional nature of *Drosophila* promoters (Core et al. 2012; Mikhaylichenko et al. 2018).  
145 Moreover, H3K27ac has the expected higher signal levels at promoters compared to distal sites,  
146 (Kheradpour et al. 2013; Kwasnieski et al. 2014). Interestingly, while all three regulatory signals  
147 (ATAC-seq, H3K27ac and H3K4me3) are highly correlated at the promoters of actively  
148 transcribed genes (8,433 promoters contain all 4 signals, Fig 1c, left upset plot), 3,907 regions  
149 marked by H3K4me3 and overlapping peaks of ATAC-seq and/or H3K27ac show no detectable  
150 RNA-signal (Fig. 1c bar plots, 1b). Approximately 850 of these involve annotated transcripts of  
151 non-coding RNA (Flybase annotation) that lack a poly-A tail and were thus not selected in our  
152 Poly-A+ RNA-seq library. This suggests a surprising number of additional unannotated  
153 transcriptional events even within the well-annotated *Drosophila* genome.

154 The majority of H3K27ac (62.5%) and ATAC peaks (63.7%) are distal to an annotated  
155 promoter, and likely represent enhancer elements. Of the distal ATAC peaks, 58%  
156 (12,587/21,594) have no H3K27ac signal and may represent inactive enhancers or other  
157 regulatory elements, e.g. insulators (Fig. 1c). The remaining 9,007 distal elements overlap  
158 H3K27ac signal (Fig. 1c, right), which is generally bimodally distributed around the ATAC-seq



159 peak (Fig. 1b), suggestive of active enhancers. Conversely, 40% (6,116/15,123) of H3K27ac  
160 peaks do not overlap a significant ATAC peak (Fig. 1c, right) and represent regions with  
161 quantitatively lower ATAC signal (Fig. S1c), below our stringent threshold for detection. Both  
162 gene expression (RNA-seq) and non-coding elements (based on ATAC-seq and chromatin  
163 signatures) show evidence of dynamic activity, with the majority (72%-96%) of features showing  
164 statistically significant changes in total counts between developmental time points across all *F1*  
165 lines (Fig. 1c, pie charts; Methods), *CG12402* being one example (Fig. 1a).

166 Taken together, these features demonstrate both the quality and richness of the data and its  
167 usefulness to further annotate the regulatory landscape of the *Drosophila* genome at these  
168 important stages of embryogenesis.

169

#### 170 ***Allele-specific variation is common across genotypes and regulatory layers***

171 To examine the impact of genetic variation, reads from each cross were mapped to  
172 personalized genomes for each parent and assigned to the maternal or paternal haplotype, where  
173 possible (Methods). To test for allele-specific differences for each gene per line and time  
174 combination, we used an empirical Bayes framework to model allele-specific counts for each  
175 data type using a beta-binomial model (Fig. S2a). Most promoter proximal and distal elements  
176 had the expected allelic ratios centered at 50:50 across autosomes (Fig 2a), with a slight elevation  
177 in the magnitude of allelic imbalance (AI) at distal sites (Fig. S2b). RNA allelic ratios were also  
178 concordant with the direction of change of embryonic eQTL (Fig. S2c), previously quantified in  
179 the same paternal lines at the same stages of embryogenesis (Cannavo et al. 2017), further  
180 verifying our approach.

181 To evaluate sex ratios in the embryo pools, and to set a reference point for evaluating allelic  
182 imbalance and dosage compensation on the X-chromosome (Lucchesi and Kuroda 2015), we  
183 sequenced the genomic DNA (gDNA) of each cross. This confirmed that our embryonic pools  
184 were relatively sex balanced, with the expected X-chromosome allelic ratio of ~0.66 observed  
185 across our gDNA dataset (Fig 2b). Consistent with full dosage compensation on the maternally-  
186 derived male X chromosome (Georgiev et al. 2011), we observed a maternal:paternal ratio of  
187 0.74 for RNA (Fig. 2b; Methods). Interestingly, a similar degree of up-regulation (dosage  
188 compensation) was not observed for chromatin data: for both chromatin accessibility and

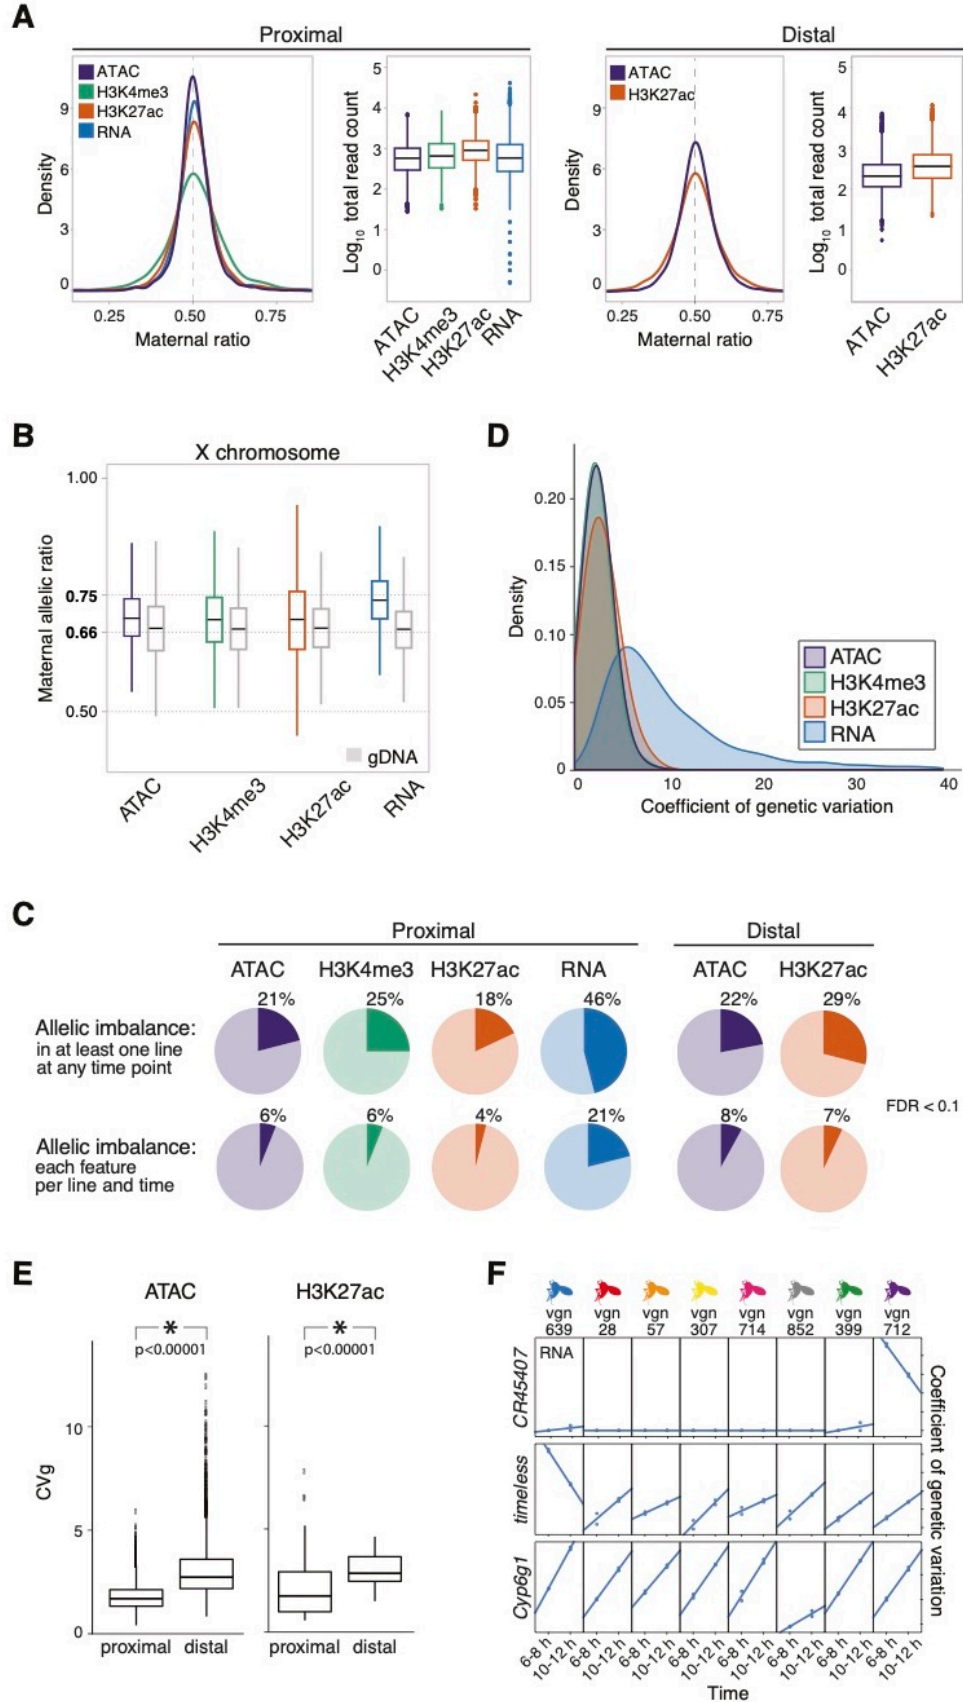

190 **Figure 2: Allelic imbalance is common across regulatory data types**

191 **a.** Density plot of allelic count distribution and matching boxplot showing total read count abundance ( $\log_{10}$ )  
192 in the autosomes at TSS proximal (left) and distal (right) regions for all data types assayed. **b.** Box plot  
193 shows the distribution of the maternal allelic ratio of X chromosome in each data type. Each distribution is  
194 compared to the allelic ratio observed in genomic DNA in grey. **c.** Pie charts show significantly allelic  
195 imbalance (AI) genes/features at promoter proximal (left, TSS +/-500 bp) and distal (right, 500-1500 bp +/-  
196 from TSS) regions for all four data types (FDR<0.1). *Upper:* AI events in at least one F1 line at any time  
197 point. *Lower:* AI events detected in all 8 F1 lines in all time points, on a per line and time basis. **d.** Smoothed  
198 histograms show the distribution of coefficients of genetic variation for all features with statistically  
199 significant between-line variances within each regulatory layer. **e.** Box plots show the distribution of  
200 coefficient of genetic variation (CVg, y axis) for chromatin accessibility (left) and H3K27ac signal (right),  
201 for promoter -proximal and -distal sites. Genetic influences are more pronounced at distal regulatory  
202 elements in ATAC and H3K27ac. **f.** Line plots show three examples of individual lines having distinct  
203 expression profiles. Coefficients of genetic variation are typically larger for RNA than for non-coding  
204 features, an effect that often results from one or two lines having significantly altered expression relative to  
205 the panel as a whole.

206

207 histone modifications, the observed ratio at X chromosome sites (H3K27ac=0.688,  
208 H3K4me3=0.692) is more similar to the observed genomic ratio of 0.66 than to the expected  
209 ratio of 0.75 under full dosage compensation (Fig. 2b). The ratios showed no significant  
210 difference when comparing proximal to distal sites, arguing against the hypothesis that the two-  
211 fold upregulation of gene expression on the male *Drosophila* X chromosome results from a two-  
212 fold increase in the loading of polymerase at its genes' promoters (Conrad et al. 2012). Our  
213 results rather indicate that whatever the mechanism of dosage compensation in *Drosophila*, it  
214 does not lead to a linear increase in chromatin accessibility on the male X chromosome, though  
215 some increase in accessibility on the upregulated X is consistent with our measurements (Urban  
216 et al. 2017; Pal et al. 2019). Regardless of its cause, we used the empirically observed average  
217 ratio for X-chromosome features for each data type to form the null-hypothesis in subsequent  
218 beta-binomial tests for allelic imbalance.

219 Overall, allelic imbalance is common, with 46% of genes and between 18-25% of non-coding  
220 features showing statistically significant AI in at least one line at one or more time point (Fig. 2c,  
221 FDR <0.1). The magnitude of AI is generally evenly distributed across SNPs with a range of  
222 minor allelic frequencies, however highly imbalanced peaks show a strong enrichment for  
223 extremely rare SNPs (including potentially *de-novo* mutations) found uniquely in the maternal  
224 line relative to the 205 lines of the full DGRP panel (Fig. S2d,  $\chi^2$  test;  $p < 2.2e-16$ ),  
225 highlighting the disproportionate impact of rare and *de-novo* mutations on expression phenotypes

226 (Cannavo et al. 2017). Allelic imbalance is more frequently observed for RNA than for other  
227 regulatory layers (Fig. 2c). In contrast to what is observed in mammals (Villar et al. 2015),  
228 promoter-proximal elements are slightly more polymorphic (pair-wise differences ( $\pi$ ) = 0.132 vs  
229 0.129, Wilcoxon-test  $p = 1e-10$ ) and evolve faster (phyloP = 0.514 vs 0.560, Wilcoxon-test,  $p <$   
230  $2.2e-16$ ) in *Drosophila* as compared to distal elements (putative enhancers) (Table S3). Despite  
231 this, distal peaks of open chromatin and H3K27ac show larger (Tukey's ASD,  $p < 0.0001$ )  
232 and more frequent ( $\chi^2$  test,  $p < 2.2e-16$ ) allelic imbalance than their proximal counterparts (Fig  
233 S2b).

234 To understand how allelic-imbalance relates to heritable variation at the total count level, we  
235 took advantage of the fact that our measured F1 lines share a common maternal genotype. As a  
236 result, line effects (from a linear model) are expected to be directly proportional to heritability –  
237 the degree to which phenotypic variation can be explained by genetic factors (Lynch and Walsh  
238 1998). To make these effects comparable across genes and features, line effects (standard  
239 deviations) were scaled by the mean read count of each feature, expressing line effects as a  
240 percentage deviation from the mean phenotype (coefficient of genetic variation). For chromatin  
241 features, the magnitude of genetic variation on measured signal is relatively modest, with the  
242 average peak varying by ~5-10% of the mean phenotype among crosses (Fig. 2d). Overall, the  
243 effects of heritability genetic variation is higher at distal regulatory elements as compared to their  
244 proximal counterparts (Fig. 2e,  $p < 1e-5$ , Methods), consistent with the greater magnitude of AI  
245 at distal sites. For RNA, in contrast, the magnitude of genetic effects is pronounced, with an  
246 average coefficient of genetic variation of ~9% and some genes showing coefficients of ~40%,  
247 indicating that genetically encoded differences in expression can account for nearly half of some  
248 genes' mean expression levels. In many cases, such high coefficients are driven by one or a few  
249 lines showing highly divergent patterns of expression (Fig. 2f, right) suggesting that large-effect  
250 gene expression differences in this population can be driven by large-effect *cis*-acting mutations.

### 251 ***Allelic imbalance is pronounced in metabolism and environmental response genes***

252 Imbalanced genes and associated regulatory features are enriched for fast-evolving and  
253 *Drosophila*-specific genes lacking clear categorical annotations (Mi et al. 2003; Turner et al.  
254 2008) and are depleted in TFs and their associated regulatory elements (Fig. S3, Table S4),

255 consistent with our previous eQTL study (Cannavo et al. 2017). AI is also enriched for  
256 metabolic genes at the RNA level, although interestingly this is not observed for associated  
257 regions of open chromatin or histone modifications (Fig. S3, Table S4). The observed  
258 differences in AI among gene categories may reflect differential histories of selection; regulatory  
259 regions in the vicinity of TFs show a depletion of nucleotide diversity ( $\pi$ , rank biserial  
260 correlation = -0.052,  $p < 1e-4$ ) and harbor more low-frequency SNPs (rank biserial correlation =  
261 -0.173,  $p = 2.8e-3$ ; Table S4) compared to background. However, this difference AI could also  
262 be explained by different gene categories having different sensitivities to mutations (buffering), a  
263 point we explore further below.

264 For most gene categories, AI is equally likely to favor the maternal or the paternal allele.  
265 However, a subset of categories shows consistent and often large parent-specific biases, a trend  
266 that is particularly striking for male-biased genes associated with immunity or insecticide  
267 resistance (Fig. S4a; Table S5). *Cyp6g1*, for example, is not expressed in embryos of our  
268 maternal line (Fig. S4b), which is derived from a laboratory stock isolated before the widespread  
269 use of agricultural pesticides, or in embryos sequenced by the modENCODE project (Celniker et  
270 al. 2009). It is, however, strongly upregulated in every measured paternal haplotype from the  
271 wild, and its overexpression contributes to DDT resistance in multiple *Drosophila* species (Fig.  
272 S4b, (Daborn et al. 2001; Battlay et al. 2016)). Highly imbalanced genes like *Cyp6g1* (Table S5)  
273 overlap genes whose expression varies extensively among lines (Fig. S4c,  $p < 1e-6$ ) and who  
274 have high levels of heritability, highlighting the important contribution of selection on *cis*-  
275 regulatory elements in shaping responses to changing environments.

276

### 277 ***The impact of cis-acting genetic variation is largely consistent across development***

278 We next evaluated if, and to what extent, allelic ratios change during development. Overall,  
279 we observed a surprising constancy of allelic imbalance between embryonic time points: Despite  
280 the temporal modularity of many *cis*-regulatory elements, imbalanced features at one time point  
281 have a ~50% chance of being imbalanced in the subsequent time-point (Fig. 3a, S5a). To further  
282 quantify the potential impact of development on allelic ratios, we constructed a series of linear  
283 models comparing the effect sizes of genetics (genotype/line effect) vs developmental stages  
284 (time effect) on total counts and allelic ratios across our experimental design. For total counts,



285 developmental time was the greatest contributor to variation across all data types (Fig. 3b, upper  
 286 panel), consistent with the clear time specific clustering by principal component analysis (Fig.  
 287 3b, lower panel, shown for RNA, Methods). Interestingly, this predominance of time is largely  
 288 restricted to distal and not proximal sites for ATAC-Seq (Fig 3d), likely reflecting the frequently  
 289 constitutive accessibility of promoters during *Drosophila* embryogenesis (Cusanovich et al.  
 290 2018). In contrast to the total counts, the impact of developmental time on allelic ratios is  
 291 significantly reduced compared to genetic (line) effects (Fig 3c, upper panel). Correspondingly,  
 292 there is a lack of time-point specific clustering in PCA (Fig 3c, lower panel), although there are  
 293 some examples of allelic ratios that change over time in a coordinated manner between  
 294 regulatory layers (Fig. S5b).

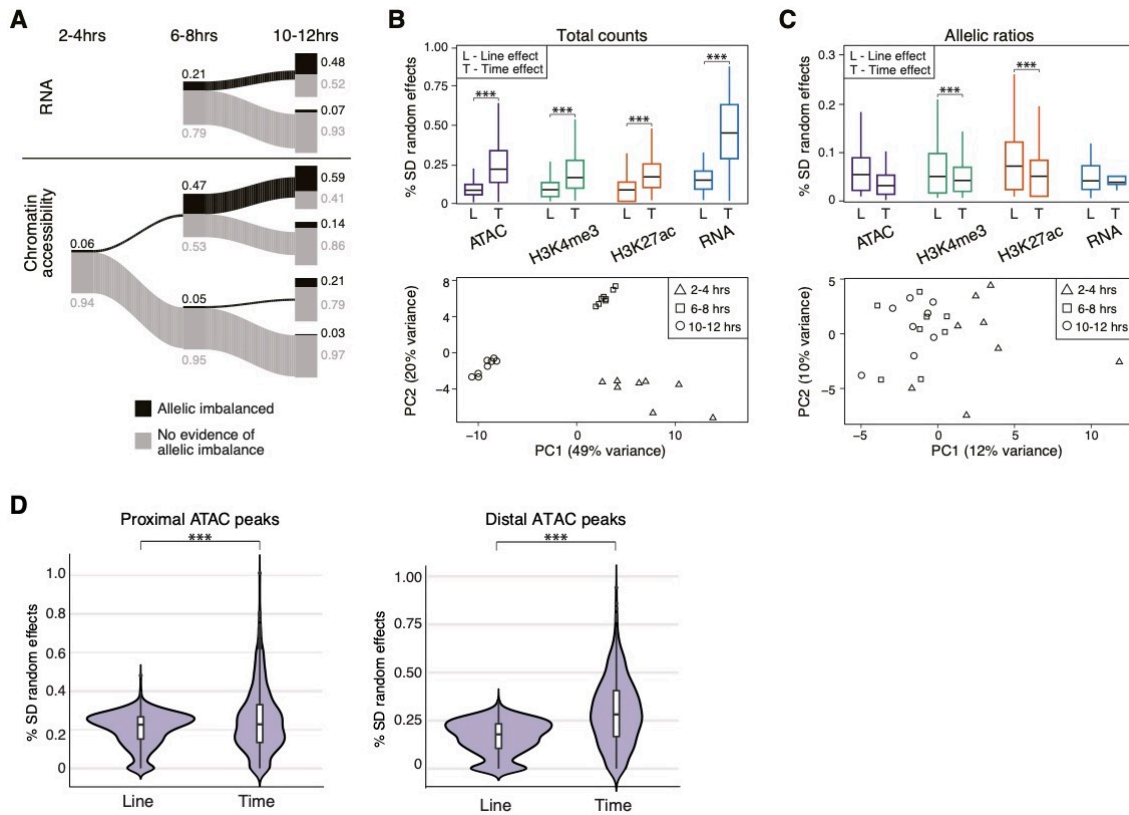

295

296 **Figure 3: Allelic imbalance is generally not predictive of developmental time**

297 **a.** The relationship of allelic imbalance across time points for RNA (upper panel) and chromatin  
 298 accessibility (lower panel). Proportions of AI and non-AI features are shown in black and grey,  
 299 respectively, and represented by the thickness of line. Exact proportions for each category are provided as  
 300 numbers. Data for 2-4 hour time point for RNA are not included due to presence of maternal transcript at  
 301 this stage. **b. Top:** Box plots show the distribution of effect sizes obtained from mixed linear models, for  
 302 total counts. For each type of data (gene/feature), the effect sizes of time (T) and line (L) effects are shown.



303 *Bottom*: Principal component analysis of gene expression for total counts. **c.** *Top*: Box plots showing the  
304 distribution of effect sizes obtained from mixed linear models, for allelic ratios. For each type of data  
305 (gene/feature), the effect sizes of time (T) and line (L) effects are shown. *Bottom*: Principal component  
306 analysis of gene expression for allelic ratios. **d.** Results from mixed linear models examining the effect of  
307 developmental time versus line (genotype) between proximal and distal ATAC-seq peaks for total count  
308 data. Distal peaks show a larger time effect compared to genotype effect (Mann-Whitney U,  $p < 2.2e-61$ ).  
309 This is only slightly evident for promoter proximal peaks (Mann-Whitney U,  $p < 8.5e-5$ ).

310

311 Interactions between genetic and developmental effects can play an important role in gene  
312 regulation (Paaby and Gibson 2016; Yadav et al. 2016). We therefore looked for evidence of  
313 interaction effects in linear models fitted to total counts or allelic ratios containing only time,  
314 only genotype, time plus genotype (time + genotype), or interactions between the two (genotype  
315 x time (GxT)). Interaction effects occur frequently at the total count level and are particularly  
316 common for gene expression, making up nearly 30% of all analyzed models (Table S6) and  
317 highlighting a potentially important role for developmental stage by genetic (GxT) interactions in  
318 population-level variation during embryogenesis, as previously observed (Cannavo et al. 2017).  
319 In contrast, there is little evidence for interaction effects at the level of allelic ratios for gene  
320 expression or ATAC-seq peaks (Table S6), consistent with the relatively small numbers of allelic  
321 ratios reported to show influences of gene x environment interactions across environmental  
322 conditions (Moyerbrailean et al. 2016; Knowles et al. 2017).

323 In summary, allelic effects are often larger at distal compared to promoter regions, with allelic  
324 effects at both regions being surprisingly stable across developmental time points. In contrast,  
325 total counts vary dramatically between time points, with interactions between genotype and  
326 developmental stage (GxT) being common, particularly for gene expression. Given that total  
327 counts are influenced by genetic variation in both *cis* and *trans*, this highlights an important role  
328 for *trans* acting variation in the maintenance of evolutionarily relevant interaction effects

329

### 330 ***Information flows in different directions across cis-regulatory layers***

331 Although quantitative signals at chromatin features are highly correlated with gene  
332 expression, the relative causal relationships between chromatin accessibility, histone  
333 modifications, and gene expression remain unclear. To assess this, we used allelic ratios as a  
334 perturbation measured at different regulatory layers to model the paths by which genetic

335 variation influences regulatory phenotypes. Allelic ratios in all pairs of datatypes are correlated,  
336 to varying extents (Fig. 4a), and in all cases we could reject the null hypothesis of independence  
337 (e.g. highest p-value between all comparisons was  $4.2e-17$  for ATAC and H3K4me3). We tested  
338 for an enrichment/depletion of co-occurring, statistically significantly imbalanced (FDR < 0.1)  
339 genes/features using an intersection-union test (Fig 4b; Methods), using a distance of +/-1500 kb  
340 to assign distal features to genes. The co-occurrence of allelic imbalance is especially pronounced  
341 for chromatin features, in particular H3K4me3 and proximal H3K27ac with a log-odds >2.0 (Fig.  
342 4b). Interestingly, for chromatin accessibility and H3K27ac, the co-occurrence of AI is more  
343 pronounced at promoters (proximal) than enhancers (distal) (Fig. 4b), despite allelic imbalance  
344 being slightly more frequent ( $p < 2.2e-16$ , Fig. 2c) and of greater magnitude (Fig. S2b) at distal  
345 sites. This suggests that H3K27ac and chromatin accessibility are more functionally coupled at  
346 promoters compared to enhancers, perhaps reflecting the fact that not all active enhancers seem  
347 to require H3K27ac (Bonn et al. 2012; Pradeepa et al. 2016).

348 Due to the large amount of covariation between the different regulatory features (Fig. 4a), it is  
349 difficult to infer causal relationships from correlation data alone. To address this, we used partial  
350 correlation to identify independent, pairwise correlations between multiple co-varying variables  
351 beyond their global correlations after thresholding on allelic ratios to remove features/genes with  
352 low information content (Fig. 4c, S6a, Methods) (Lasserre et al. 2013; Pai et al. 2015). We first  
353 analyzed the total count data to evaluate the overall relationships among histone modifications  
354 and gene expression. Our results closely mirror those of Lasserre *et al* in CD4+ and IMR90 cells  
355 (Lasserre et al. 2013), including finding a clear relationship between gene expression levels and  
356 the total abundance of H3K27ac that ‘explains away’ (at least in a statistical sense) much of the  
357 correlation between gene expression and promoter-proximal H3K4me3 (Fig. 4d, left). We also  
358 observed a statistically significant relationship between open chromatin and gene expression,  
359 though the strength of this partial correlation is reduced relative to standard Pearson correlation  
360 analyses (Fig. S6b).

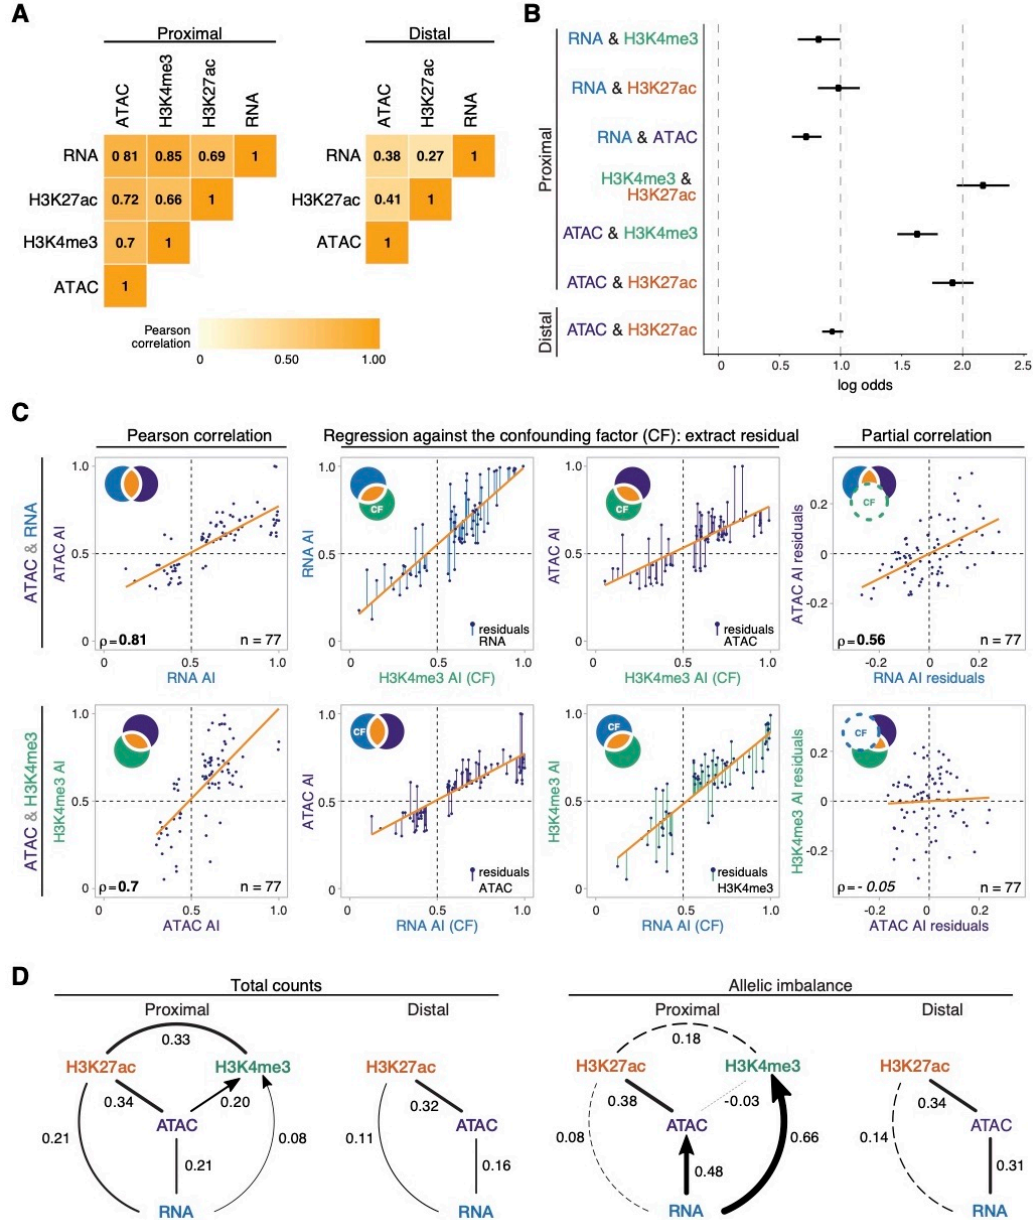

**Figure 4: Allelic imbalance is propagated through regulatory layers via different epigenetic paths**

**a.** Heatmaps show Pearson correlation coefficient of allelic ratios between each pair of data type for promoter proximal (left) and promoter distal (right) regions. Data restricted to 6-8 hours plus 10-12 hours, and features/genes whose allelic ratio exceeds 0.5 +/- 0.06. **b.** Increased log odds of co-occurrence of allelic imbalance between two regulatory layers. X-axis shows the log odds based on intersection-union tests (Methods). 6-8 hours plus 10-12 hours data is shown. Bars stemming from dots are 95% confidence intervals. **c.** Stepwise example of a partial correlation analysis of allelic ratios for three variables (ATAC, RNA and H3K4me3). Partial correlation analysis is shown between gene expression and chromatin accessibility (upper row), and promoter proximal H3K4me3 and chromatin accessibility (lower row). Venn diagram schematics (top left) illustrates the variance of each variable and its shared proportion

(orange), as measured by linear regression (orange lines). *Left panels*: Pearson correlations for the two comparisons are significant. *Middle panels*: regression of each initial variable against a third, confounding variable (H3K4me3, upper row; RNA, lower row). Residuals of the initial variables (colored lines) represent the non-overlapping part of the circle of the same color in the schematic. *Right panels*: correlations of the residuals, which exclude the variance shared by the confounding factor (dashed circle in schematic). This resulting partial correlation is not significant in the bottom example, suggesting a lack of direct correlation within the pair H3K4me3-ATAC. **d.** Partial correlation and directional dependency regression for total counts (left) and allelic ratios (right). Significant partial correlations (solid lines) suggest dependencies among regulatory layers. For each significant edge ( $p < 0.01$ ), copula regression was used to assign directionality (arrows,  $\delta > 0.01$ ). Line thickness indicates the value of partial correlations, dashed lines indicate non-significance. Results for promoter proximal and distal regions shown separately.

361 To assess the functional impact of *cis*-regulatory perturbations, we next applied the partial  
362 correlations analysis to allelic ratios (Fig. 4d, right). Relative to the total count data, allelic ratios  
363 reveal a much stronger relationship between open chromatin and gene expression for both  
364 proximal and distal regulatory elements (Fig. 4d, right), highlighting an important, possibly  
365 causal, link between mutations affecting accessibility (presumably TF occupancy) and gene  
366 expression. A significant correlation is also observed between H3K27ac and open chromatin at  
367 promoters, though interestingly, we see little evidence for a direct relationship between H3K27ac  
368 and gene expression itself (Fig. 4d, right). The latter is surprising as it differs from what is  
369 observed with total count data, and suggests that although promoter H3K27ac is highly  
370 correlated with, and even predictive of gene expression (Karlic et al. 2010), they may not be  
371 mechanistically directly linked. In contrast, allelic ratios for promoter proximal H3K4me3 show  
372 strong evidence of a direct correlation with gene expression that is independent of, at least in a  
373 statistical sense, allelic differences in chromatin accessibility or H3K27ac (Fig. 4d, right). Taken  
374 together, this analysis suggests two independent pathways by which selection on segregating  
375 mutations could influence gene expression, one affecting open chromatin and promoter-proximal  
376 H3K27ac, and the other influencing H3K4me3.

377 To explore these relationships further, we analyzed each edge identified by partial correlations  
378 using copula directional dependence analysis (Kim et al. 2008; Lee and Kim 2019), a statistical  
379 approach based on copula regression that evaluates the directionality of the pairwise relationships  
380 allowing for non-linearities (Methods). This method assigns a direction to each edge for which  
381 there is clear evidence for greater explanatory weight in one direction. For TSS-proximal  
382 regions, this placed RNA upstream of both H3K4me3 and open chromatin (Fig. 4d right, arrow).

383 Although counter intuitive at first glance, this suggests that gene expression is not highly  
384 sensitive to variations in H3K4me3, while conversely changes to RNA is more predictive of  
385 H3K4me3 enrichment. This could reflect redundancy between regulatory elements, i.e. changes  
386 in a single open chromatin region, as tested here, may not be sufficient to impact expression in an  
387 allele-specific manner. This result is also consistent with the hypothesis that H3K4me3 is not  
388 functionally required for transcription, but may rather be deposited as a consequence, and be  
389 involved in post-transcriptional events, as recently proposed (Howe et al. 2017). Similarly,  
390 allele-specific variation in RNA better explains variation in chromatin accessibility compared to  
391 the reverse, i.e. not all variation in open chromatin leads to a corresponding change in gene  
392 expression (Fig. 4d, right).

393 In summary, *cis*-acting genetic variation shows greater covariance between open chromatin  
394 and H3K27ac enrichment at promoters compared to putative enhancers. By measuring  
395 informative dependencies on the impact of *cis*-acting genetic variation, we identified multiple  
396 epigenetic pathways affecting transcription. Specifically, genetic variation acts to change gene  
397 expression levels via the interplay between at least two different promoter-proximal paths: open  
398 chromatin and H3K27ac, or H3K4me3. Moreover, the flow of information suggests that gene  
399 expression is often buffered against *cis*-acting mutations (presumably affecting TF binding) at  
400 associated regulatory elements.

401

#### 402 ***Regulatory buffering varies depending on gene function and local chromatin architecture***

403 Genes from different functional categories often have differences in the complexity of their  
404 regulatory landscapes. Metabolic genes, for example, typically have relatively simple and more  
405 compact regulatory landscapes with fewer enhancers that are generally located close to the  
406 gene's promoter (Zabidi et al. 2015). TFs, in contrast, have many enhancers often with partially  
407 overlapping spatial activity ("shadow enhancers") that are located at varying distances from the  
408 gene's promoter (Spitz and Furlong 2012; Long et al. 2016). This additional regulatory  
409 complexity is thought to make TFs more robust to deletions and sequence variation affecting  
410 their regulatory elements (Xiong et al. 2002; Cretekos et al. 2008; Montavon et al. 2011;  
411 Cannavo et al. 2016). To examine this, we assessed the extent to which allelic imbalance in the  
412 expression of different gene categories is independent of, or decoupled from, imbalance in their

413 associated regulatory elements, treating gene categories with greater independence as ‘buffered’.  
414 Among all comparisons of conditional probabilities, the expression of TFs, transmembrane  
415 genes, ancient genes (conserved bilaterian processes), signalling pathway genes, secreted genes,  
416 are most insensitive to imbalance in other regulatory layers (Fig. 5a). In contrast, genes and their  
417 regulatory elements associated with cytoskeletal function, glycoproteins, and notably metabolism  
418 show an increased sensitivity to allelic imbalance in other regulatory layers (Fig. 5a). Taken  
419 together, our analyses suggest that in addition to purifying selection acting to remove genetic  
420 variation, regulatory buffering helps to ensure robust expression of TFs and other developmental  
421 regulatory factors from the effects of *cis*-acting mutations.

422 To more directly assess the relationship between buffering and regulatory complexity, we  
423 compared the number of ATAC-seq peaks in a gene’s regulatory domain (+/- 1.5kb TSS) with  
424 the probability of imbalance in that gene’s expression. Imbalanced genes have fewer associated  
425 ATAC-seq peaks genome-wide (Kruskal Wallis  $p=1.1e-16$ , Fig 5b). This trend is particularly  
426 striking for single-peak genes, which have significantly more AI than genes with multiple  
427 associated regulatory elements (Mann-Whitney U test,  $p\text{-value}=6.4e-6$ ). Consistent with the  
428 observation of transcriptional robustness (a lack of AI) for genes with multiple regulatory  
429 elements, genes associated with partially redundant enhancers (or shadow enhancers) have a  
430 modest reduction in the frequency of allelic imbalance compared to genes without (Fig. 5c,  
431  $\chi^2=5.3$ ,  $p=0.02$ ), based on a previously defined set of shadow enhancers for mesodermal genes  
432 (Cannavo et al. 2016). We note, however, that this buffering is not absolute – even genes with  
433 multiple regulatory elements are more likely to be imbalanced when multiple associated peaks  
434 show unbalanced allelic ratios (Fig. 5d).

435 In summary, there is a relationship between a gene’s regulatory complexity and the degree to  
436 which its expression is influenced by non-coding genetic variation in its regulatory elements,  
437 with more regulatory elements providing a degree of buffering against genetic perturbations.  
438 Allelic imbalance at multiple enhancers in the vicinity of a gene can have a cumulative influence  
439 on allele-specific gene expression.



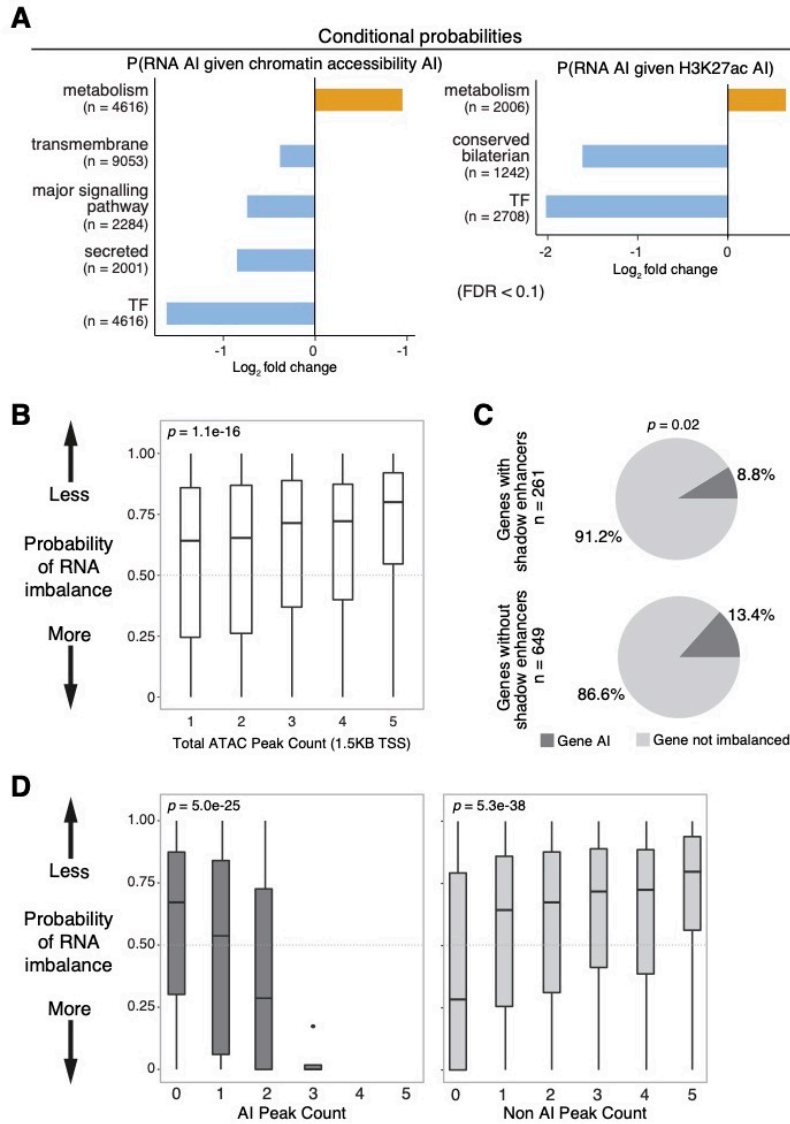

**Figure 5: Regulatory buffering varies across gene categories and with local chromatin structure**

**a.** Conditional probability of allelic imbalance in gene expression given allelic imbalance in associated chromatin peaks (left) and regions of H3K27ac (right) across gene categories. X-axis show log<sub>2</sub> fold change where background is based on genome-wide expectation. Gene categories enriched (orange) or depleted (blue) for imbalance, relative to background, are indicated (FDR>0.1, Fisher's exact test). **b.** Box plots denote the probability of allelic imbalance in gene expression based on numbers of neighbouring ATAC peaks (TSS < 1.5kb). Genes associated to more ATAC peaks are more likely to show similar expression in both alleles compared to genes with fewer peaks. **c.** Pie charts displaying the proportion of genes with allelic imbalance in RNA associated to ATAC-seq peaks overlapping known partially redundant/shadow enhancers (top) or not (bottom). Genes associated with shadow enhancers are less likely to be allelic imbalanced compared to genes without ( $\chi^2=5.3$ ,  $p=0.02$ ). **d.** ATAC-seq peaks have a cumulative effect on gene expression. The probability of imbalance in gene expression (y-axis) is shown as a function of the number of ATAC-seq peaks that are allelic imbalanced (left) or not imbalanced (right).

## 440 **Variation in gene expression is less heritable than for chromatin features**

441 Gene expression phenotypes are influenced by linked *cis*-acting genetic variation, but also by  
442 *trans* acting variation that is not directly captured using F1s alone. To estimate the relative  
443 impact of *trans*-acting variation, we performed the same experiments (iChIP-Seq, ATAC-Seq,  
444 and RNA-Seq) on a trio of lines consisting of one F1 line and stage-matched embryos from the  
445 maternal (vgn) and paternal (DGRP-399) lines. As the two homologous chromosomes in F1  
446 cells have a common nuclear *trans* environment, allelic ratios in F1s estimate *cis*-based  
447 differences between the two parents. Differences in parental read counts not reflected in F1  
448 allelic-ratios give an estimate of *trans*-acting contributions to between line divergence (Landry et  
449 al. 2005; Tirosch et al. 2009; Goncalves et al. 2012; Wong et al. 2017).

450 Using a maximum likelihood framework, we classified features as *cis*, *trans*, *cistrans*, or  
451 *conserved* and found a similar distribution among categories for all non-coding chromatin  
452 features, with *cis*-acting effects being more common than *trans* (59% vs. 41%,  $p < 2.2e-16$ ,  
453  $\chi^2$ ; Fig. 6a, Methods, Table S7). This enrichment is particularly pronounced for histone  
454 modifications, with nearly twice as many *cis* influenced peaks compared to *trans* (Fig 6a, S7a).  
455 Gene expression, in contrast, is more strongly influenced by *trans*-acting genetic variation (Fig.  
456 6a: 55% *trans* vs. 45% *cis*,  $p = 0.0073$ ,  $\chi^2$ ). Moreover, a higher fraction of *cistrans* genes  
457 have more *trans* compared to *cis* variation, a pattern not observed for chromatin features (*trans*  
458 proportions 0.67 vs. 0.53,  $p = 2.77e-05$ ; Fig. S7a).

459 Previous studies suggest that the effects of *cis*-acting mutations are more likely to be inherited  
460 in an additive manner, compared to *trans* influences (Lemos et al. 2008; Meiklejohn et al. 2014;  
461 Wong et al. 2017). This has important consequences, as it is typically *additive* genetic variation  
462 that is most directly acted upon by natural selection (Lynch and Walsh 1998). We evaluated this  
463 in our data by examining the extent to which the F1 signal (total read count) for each  
464 gene/feature departed from the parental average (a strictly additive model). For open chromatin,  
465 whether influenced by *cis* or *trans*, we could reject a non-additive model in fewer than 1% of  
466 cases (Fig. S7b), consistent with the finding that most variation affecting TF binding is inherited  
467 additively (Wong et al. 2017). For gene expression, in contrast, the additive model could be  
468 rejected for 32% of genes, with *trans* influenced genes departing from an additive model far  
469 more often than *cis* (Fig. 6b: 24% vs. 2%,  $p < 1e-4$ ).

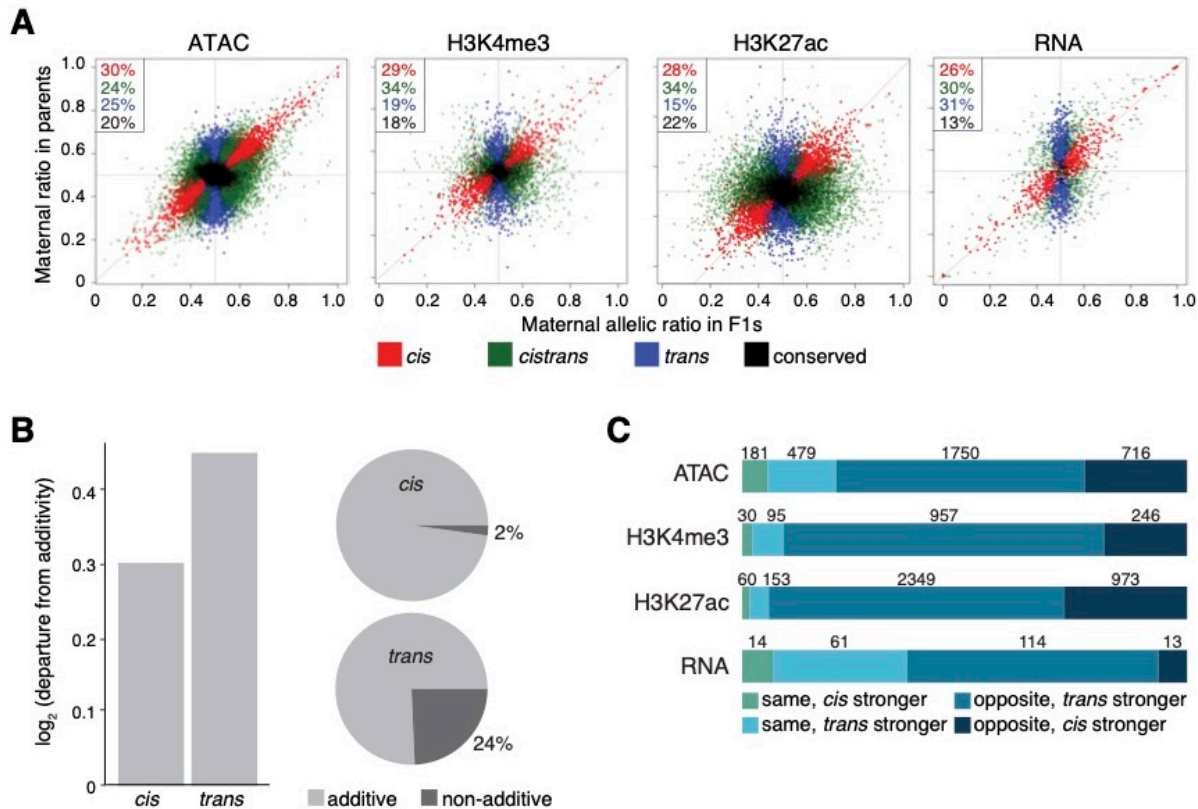

**Figure 6: Chromatin features are more heritable than gene expression**

**a.** Scatter plots of F1 allelic ratio (x-axis) against the maternal/paternal ratio observed in (normalized) parental, total count libraries. Genes/features along the diagonal are exclusively influenced by *cis*-acting variation, while vertically distributed genes/features show exclusively *trans*-influences. Colors indicate maximum likelihood classification into *cis*, *trans*, and *cistrans* (a mixture of *cis* and *trans*) or *conserved* genes/features. **b.** Left, bar plots shows the magnitude of deviation from additivity (parental mean) for features classified as *cis* vs. *trans* (BIC  $\geq 2$ ). Right, pie charts showing fraction of additive and non-additive genes for *cis* (upper) and *trans* (lower) classes. **c.** Classification of *cistrans* effects (BIC  $\geq 2$ ) for each regulatory layer into categories reflective of likely selective effects. Numbers and horizontal bars represent the size and relative proportions of each *cistrans* relative direction class in each data type. There is more directional selection (same directions,  $cis + trans > cis$ ) than compensatory evolution (opposite directions,  $cis + trans < cis$ ) in gene expression as compared to in chromatin features.

470 To better understand the factors that contribute to the proportion of *trans*-acting variation (and  
 471 by association, non-additive heritability), we examined the contribution of regulatory complexity.  
 472 Mirroring our buffering results, genes with more regulatory elements in their vicinity are more  
 473 likely to be classified as *trans*-acting ( $trans = 2.58$  peaks per gene vs. 1.9,  $p = 0.00094$ ) and more  
 474 likely to show non-additive inheritance (non-additively inherited genes = 2.19 peaks per gene vs.  
 475 1.82 peaks per gene,  $p = 1.4e-3$ ). Similarly, there is a significant, though modest, enrichment of

476 *trans* influences among TFs and a depletion among metabolic genes, two categories that are  
477 strongly distinguished in the complexity of their associated regulatory landscapes (Table S8).  
478 Correspondingly, among 80 tested gene categories, DNA-binding TFs ( $p = 3e-3$ ) and  
479 interestingly mitochondrial associated genes ( $p = 2e-6$ ) stand out as the two gene categories with  
480 statistically elevated frequencies of non-additive inheritance (Fisher's exact test; Methods).  
481 Thus, while TFs generally show reduced genetic variation among lines and reduced allelic  
482 imbalance in gene expression (Fig. S3), they are still affected by *trans*-acting variants whose  
483 non-additive inheritance reduces the efficacy by which selection can alter gene expression  
484 differences among different lines.

485 Genes influenced by both *cis* and *trans* acting variants (*cistrans*) provide an opportunity to  
486 understand patterns of recent selection: In the face of compensatory evolution, *cis* and *trans*  
487 acting influences are more likely to work in opposite directions, while directional selection will  
488 be more likely to reinforce *cis* and *trans* effects acting in the same direction. Using the  
489 classification of *cis* and *trans* by Goncalves et al (Goncalves et al. 2012), we observed that *cis*  
490 and *trans* effects were much more likely to act in a compensatory manner as compared to gene  
491 expression: for chromatin accessibility and histone modifications, 13% of *cistrans* features were  
492 classified as *same* vs. 37% for RNA (Fig. 6c:  $p < 2.2e-16$   $\chi^2$ ). This suggests that for RNA  
493 there is either more frequent directional selection or less efficient selection against directional  
494 changes. This result is robust to the method used to classify *cis* + *trans* effects (Landry et al.  
495 2005), with 63% of *cistrans* RNA features being classified as divergent for RNA vs. 22% for  
496 chromatin features (Fig, S7d:  $p < 2.2e-16$   $\chi^2$ ). Taken together, these results suggest clear  
497 differences in evolutionary trajectory between regulatory layers which reflects population  
498 processes operating at different levels of organization, as well as differences between functional  
499 gene classes.

500

501

502

503

504

## 505 Discussion

506 We used genetic variation to better understand the impact of sequence variation in regulatory  
507 DNA on embryonic gene expression, and to shed light on how these effects are propagated or  
508 buffered through different layers of regulatory information. We generated allele-specific  
509 measurements of chromatin occupancy (ATAC-seq), chromatin activity state (ChIP-seq of  
510 chromatin modifications) and gene expression (RNA-seq) in F1 embryos from eight different  
511 genotypes across multiple stages of embryogenesis. Our analysis of this extensive dataset led to  
512 several conclusions about the impact of regulatory mutations on transcriptional phenotypes.

513 First, although *cis*-acting genetic variation in gene expression and associated regulatory  
514 signals is fairly common in development, its effects are not equally distributed across the  
515 genome. Allelic variation is both more frequent and has greater magnitude at distal regulatory  
516 elements (putative enhancers) compared to promoters, despite genetic variation itself being more  
517 common at promoters. This may in part be due to differences in the relative importance of  
518 sequence content at promoters and enhancers – many promoters, particularly for broadly  
519 expressed genes, are remarkably tolerant to mutations (Schor et al. 2017). Interestingly, despite  
520 having a greater magnitude, AI at distal elements is less likely to be propagated to other  
521 regulatory layers (Fig. 3), suggesting that enhancer mutations are either more effectively buffered  
522 or of lower functional impact, a hypothesis that fits well with the observed robustness of gene  
523 expression to deletions that remove distal regulatory elements (Hong et al. 2008; Cannavo et al.  
524 2016). However, large effect gene-by-gene or gene-by-environment interactions can  
525 theoretically serve to release this ‘cryptic’ genetic variation (Gibson and Dworkin 2004;  
526 Schneider and Meyer 2017; Zheng et al. 2019). Whether such interactions are sufficiently  
527 common for regulatory traits is currently unknown, although we note here that the genetic  
528 contribution to (total count) gene expression varies considerably between time points, suggesting  
529 a substantial context-specificity to the genetic variation underlying gene expression variation.

530 Second, although all data types (open chromatin, histone modifications, RNA levels) are  
531 highly correlated, their explanatory values (potential causal relationships) as revealed by partial  
532 correlation analysis are far from equal. Using *cis*-acting variation as perturbations to  
533 development, we observed a strong, potentially direct relationship between genetic variants  
534 affecting open chromatin (TF binding) at both proximal and distal sites and gene expression, as

535 expected. The relationship between histone modifications and gene expression, however, proved  
536 more surprising – in contrast to total count data, both in this study and previously reported  
537 (Lasserre et al. 2013), we note a strong, potentially causal, link between allelic-imbalance in  
538 H3K4me3 signal and allelic imbalance in associated genes.

539 Although highly correlated with gene expression, the functional requirement of H3K4me3 for  
540 transcription is controversial (Howe et al. 2017). Our copula analysis placed H3K4me3  
541 downstream of RNA (Fig. 4d), suggesting that RNA levels are not impacted by variation  
542 affecting H3K4me3. This placement of RNA upstream of H3K4me3, inferred from our  
543 statistical analysis of the functional impact of genetic variation on both properties, is supported  
544 by recent genetic ablation studies showing that RNA transcription does not require H3K4me3  
545 (Clouaire et al. 2012; Margaritis et al. 2012; Clouaire et al. 2014). This is consistent with  
546 suggestions that H3K4me3 is deposited as a consequence of transcription and may be required in  
547 more downstream post-transcriptional events (Howe et al. 2017). In addition, we also observed a  
548 second, independent, pathway in which genetic mutations affecting H3K27ac impacted gene  
549 expression, but only when they were also associated with *cis*-influenced changes in chromatin  
550 accessibility.

551 Third, the impact of *cis*-regulatory variation on gene expression is influenced by regulatory  
552 complexity, with genes that have more regulatory elements being less likely to show allelic  
553 imbalance (Fig 5). In part, this may be due to selection against variation in regulatory elements  
554 associated with these genes. As observed in other studies (Cannavo et al. 2016, ), we found a  
555 clear reduction in allelic variation in regulatory elements associated with TFs and developmental  
556 regulators as compared to other gene categories. But selection is unlikely to be the whole story.  
557 Even when associated mutations are present, TFs and other genes with complex regulation show  
558 a degree of independence from allelic imbalance in associated regulatory layers, an active  
559 buffering process resulting from the presence of multiple regulatory inputs (Waymack 2019).  
560 Notably, the buffering of genes with multiple regulatory elements is not absolute - as the number  
561 of regulatory regions with AI near a gene increases, so does the probability that the gene shows  
562 allelic imbalance. We propose that information averaging in *cis*-regulatory landscapes enhances  
563 the overall consistency of transcriptional responses, with clustered regulatory elements, including  
564 shadow enhancers, leading to a reduction in overall allelic imbalance. In addition, large effect  
565 mutations can directly influence gene expression, with likely consequences for adaptive



566 phenotypes, while small effect mutations, *e.g.* those affecting histone modifications or chromatin  
567 accessibility without affecting gene expression, may accumulate over time to have functionally  
568 relevant phenotypes.

569 Finally, we found that *trans*-acting variation is more common for RNA than for any other  
570 regulatory layer, with resulting consequences for the selection and heritability of gene expression  
571 relative to chromatin features. Specifically, genes with complex regulatory landscapes, *e.g.*  
572 transcription factors, had a higher *trans* proportion of their overall genetic influences. This  
573 observation, which is likely due to buffering effects within complex *cis* regulatory landscapes,  
574 has potentially counter intuitive evolutionary consequences, as predominantly *trans*-influenced  
575 genes are significantly more likely to show non-additive, and thus less selectable, patterns of  
576 inheritance. As a result, *trans*-acting variation affecting genes such as TFs may remain in  
577 populations even as negative selection and buffering act to reduce the influence of *cis*-acting  
578 mutations.

579 In summary, allelic variation in chromatin accessibility and histone modifications at  
580 regulatory elements is prevalent in the genome and capable of propagating across regulatory  
581 layers. Information flow depends on the type of regulatory element and appears mitigated at  
582 developmental factors. Notably, these *cis*-regulatory changes to individual genes do not have an  
583 appreciable effect on overall developmental programs.

584

585

## 586 **Methods**

587 Detailed methods for all sections are provided in the supplementary file.

588

### 589 **Fly husbandry, crosses and embryo collection**

590 F1 hybrid embryos were generated by crossing males from eight genetically distinct inbred lines  
591 from the *Drosophila* Genetic Reference Panel (DGRP) collection (Mackay et al. 2012) to  
592 females from a common maternal “virginizer” line. The virginizer line contains a heat-shock  
593 inducible pro-apoptotic gene (*hid*) on the Y chromosome (Starz-Gaiano et al. 2001) of a  
594 laboratory reference strain (*w<sup>1118</sup>*). We made the virginizer line isogenic by backcrossing for  
595 over 20 generations (Ghavi-Helm et al. 2019). Placing embryos from the virginizer stock at 37°C  
596 kills all male embryos, thereby facilitating the collection of a large population of isogenic virgin  
597 females, which were mated to males of different DGRP lines (listed in Fig. 1a). In addition, we  
598 collected samples from the parents of one genotype (399) for *cis-trans* analysis (see below).

599

### 600 **RNA-seq, ATAC-seq and iChIP**

601 For three developmental stages (2-4hr, 6-8hr and 10-12hr after egg-laying), we performed RNA-  
602 Seq, ATAC-Seq, and iChIP for H3K27ac and H3K4me3 for pooled embryos of each F1  
603 strain. All experiments were performed in biological replicates from independent embryo  
604 collections. iChIP experiments were performed as described in Lara-Astiaso et al. 2014 (Lara-  
605 Astiaso et al. 2014). ATAC-seq libraries were 125bp PE, RNA-Seq 118bp PE, and iChIP 75bp  
606 PE. In addition, gDNA from ~100 embryos per F1 cross was extracted and 75bp SE libraries  
607 constructed. All libraries were run on a Bioanalyzer chip, multiplexed and sequenced with  
608 Illumina machines.

609

### 610 **Sequencing reads processing**

611 Strain-specific genomes and liftOver chain files were constructed for each DGRP paternal line  
612 using custom scripts to insert SNPs and indels into the *Drosophila* dm3 assembly (version 5 from  
613 FlyBase). To annotate these parental genomes, we used pslMap (Zhu et al. 2007) to shift  
614 reference annotations r5.57 to the parental genomes. ATAC-seq and ChIP-seq reads were  
615 mapped using BWA (Li and Durbin 2010), while RNA-seq reads mapped using STAR (Dobin et

616 al. 2013). In all cases, overlapping read pairs were trimmed so each base was covered only once  
617 by the higher quality read. The resulting alignments against both parental genomes were merged  
618 into a single alignment file. To generate allele-specific counts, reads were scored for their  
619 overlap with known cross-specific SNPs. Discordant reads (those overlapping alleles assigned to  
620 different parents) were discarded. Genomic DNA was generated for each F1 line to filter  
621 potentially miscalled variants, and simulated reads from each parental genome were used to  
622 assess and filter out regions with likely mappability errors. Peak calling was performed using  
623 Macs2 (-broad) for iChIP reads and Hotspot for ATAC-seq reads (Zhang et al. 2008; John et al.  
624 2011). To compare between lines and times, we constructed merged peak coordinates across  
625 samples (Supplementary methods).

626

### 627 **Test for allele-specific imbalance**

628 Due to the extensive maternally deposited transcripts still present at 2-4 hours, we excluded the  
629 RNA-seq data from this time point from all down-stream allele-specific analysis to avoid  
630 potential confounding effects in allelic imbalance measurements. To test for allelic imbalance,  
631 an empirical Bayesian method was used to test the null hypothesis for differences in read counts  
632 between F1 alleles for each feature of each data set (RNA-seq, ATAC-seq, H3K4me3,  
633 H3K27ac). Individual tests were performed for each line and for each time point. Total F1  
634 counts ( $n_g^{s,i,t}$ ) can be modeled on an allele-specific basis ( $z_g^{s,i,t}$ ) using a beta-binomial  
635 distribution. Specifically,  $z_g^{s,i,t}$  denotes the number of reads from the maternal allele mapped to  
636 feature f for pool of individuals i, of paternal strain s, at time t.  $n_g^{s,i,t}$  denotes the total number of  
637 reads mapping to genes for pool of individuals i of strain s, at time t.

638

$$z_f^{s,i,t} \sim Bi(n_f^{s,i,t}, p_f^{s,i,t})$$

639

$$p_g^{s,i,t} \sim Be(\alpha, \beta)$$

640 where  $\alpha, \beta$  are the shape parameters of the beta distribution. We tested the following scenarios  
641 by maximum likelihood estimation:

642

$$\text{No imbalance: } \alpha = \beta$$

643

$$\text{Allelic imbalance: } \alpha \neq \beta$$

644 Due to limited replicates per condition, we used information across features to reduce the  
645 uncertainty of estimates and improve power by assuming that all features have the same mean-  
646 variance relationship (Robinson et al. 2010; Love et al. 2014). Empirical data was used to  
647 estimate the over-dispersion parameter ( $\rho$ ) for each data type based on the beta-binomial  
648 distribution. Maximum likelihood estimation was used to obtain  $\alpha$  and  $\beta$  for each feature of time  
649  $t$  and strain  $s$ .  $\rho$  is calculated as follows:

$$650 \quad \rho = \frac{1}{\alpha + \beta + 1}$$

651 The mean over-dispersion value for all features was used as the shrinkage term and likelihood  
652 ratio tests (df=1) were used to obtain a p-value, which was adjusted using FDR (Benjamini  
653 1995). Autosomes were tested separately to sex chromosomes; features on chromosome X were  
654 tested using a background allelic ratio of no imbalance centered on the averaged ratio of maternal  
655 versus paternal alleles across the data set being compared (i.e. RNA, ATAC, H3K4me3,  
656 H3K27ac). Autosomal features were tested using a null distribution of 0.5.

657

### 658 **Allele-specific changes across lines and developmental time**

659 A linear mixed-effects model, where random effect components were incorporated, was used to  
660 estimate variability between pools of individuals, time points and lines,

$$661 \quad y_f^{d,s,r,t} = \mu_f + \delta_f^t + \omega_f^s + (\delta\omega)_f^t \quad \omega_f^s \sim N(0, \sigma_f^2)$$

662  $\mu_f$  is the intercept term.  $\delta_f^t$  is a random effect term denoting time.  $\omega_f^s$  is a random effect based on  
663 strain and  $(\delta\omega)_f^t$  is a interaction term for time by strain.

664 To infer the significance of time or strain dependent allele bias, we restricted the values that the  
665 parameters can take. Library size differences were corrected for at the allele-combined count  
666 level using the TMM method in ‘edgeR’ (Robinson et al. 2010) prior to analysis. Count data was  
667 filtered for reads with more than 20 allele-combined counts. Each autosomal feature was tested  
668 using read counts at SNPs common to all lines. Not all features contained enough information  
669 for statistical testing, subsequent analyses were limited to features with at least six samples in  
670 each of the three time points in at least four genetic strain.

671

## 672 **Allele-specific changes across regulatory layers**

673 Intersection-union tests were used to examine the pairwise co-occurrence of allelic imbalance in  
674 overlapping genes/features, limited to autosomes, based on rejecting the null hypothesis if a  
675 significant outcome with respect to the feature compared at the same time point exists for both  
676 data types (Berger 1996).

677 To infer pairwise relationships between regulatory data types while reducing indirect relations,  
678 partial correlation analysis was performed using ‘GeneNet’ (Opgen-Rhein and Strimmer 2007)  
679 for both allelic ratios and total count data. Directional dependence modeling was performed in a  
680 regression framework using copulas to describe the bivariate distribution between our pairwise  
681 datasets (Lee and Kim 2019). Copula regression was used to infer the flow of information for  
682 pairwise relationships that showed a significant relationship in partial correlation analyses.

683 Conditional probabilities for the probability of allelic imbalance given imbalance in a different  
684 regulatory data type were calculated by the definition:

$$685 \quad P(A|B) = \frac{P(A \cap B)}{P(B)}$$

686 where  $A$  and  $B$  are the probabilities of allelic imbalance in each data type.

687

## 688 ***Cis trans* analysis**

689 For one F1 line (vgn x 399) and its parental lines, maximum likelihood estimation (MLE) was  
690 used to compare parental and offspring ratios simultaneously to determine whether gene  
691 expression, chromatin accessibility, H3K4me3 and H3K27ac enrichments are influenced by *cis*-,  
692 *trans*-, conserved or both *cis*- and *trans*- acting effects by modeling read counts. For parents, the  
693 data was modeled using negative binomial distributions and allelic differences in F1 alleles  
694 modeled using beta-binomial distribution (Supplemental Methods). We constrained parameter  
695 estimation for each model based on four different regulatory scenarios and derived maximum  
696 likelihood values for each hypothetical case on a site-by-site basis. In the presentation of the  
697 proportions of features assigned to each category (Fig. 6a, S7c), we presented the maximum  
698 likelihood assignment. In subsequent analyses, we limited analyses to features that showed a  
699 BIC difference  $\geq 2$ .

700

### 701 **Test for compensatory mutation**

702 Genes were classified as having *cis*- and *trans*-acting influences following the procedure of  
703 Goncalves et al. (Goncalves et al. 2012). For all genes, we asked if their *cis* and *trans*  
704 contributes act to reinforce one another (same direction) or if they operated in opposite  
705 directions. Formally, for the  $i$ -th gene, we define the average log<sub>2</sub> fold change for the parental  
706 lines as  $x_i$  and the average log<sub>2</sub> allelic ratio from the F1 data as  $y_i$ . We then classified:

707 Opposite – cis stronger:  $(0 < y_i < x_i)$  OR  $(0 > y_i > x_i)$

708 Opposite – trans stronger:  $(x_i < 0 < y_i)$  OR  $(y_i < 0 < x_i)$

709 Same – cis stronger  $(0 < x_i < y_i < 2x_i)$  OR  $(0 > x_i > y_i > 2x_i)$

710 Same – trans stronger  $(0 < 2x_i < y_i)$  OR  $(0 > 2x_i > y_i)$

711 A complementary analysis following Landry et al (Landry et al. 2005) can be found in the  
712 supplemental methods.

713

### 714 **Measuring additive vs. non-additive heritability**

715 In the case of additively inherited gene expression (or read counts for any of our measured  
716 features), the signal observed in the F1 is expected to be equal to the midpoint (average) of the  
717 two parents, while non-additively inherited genes/features should show a significant departure  
718 from that midpoint. To formally test for non-additivity, we made use of the standard workflow  
719 in DESeq2 with two modifications. First, we set the betaPrior option equal to TRUE. After  
720 setting the reference genotype to the F1 (vgn x 399) using the releval function, we then extracted  
721 the results using the ‘results’ function and the contrast vector  $c(0,1,-.5, -.5)$  to contrast the full  
722 value of the F1 genotype with  $\frac{1}{2}(vgn + 399)$ . Features with an FDR < .1 were considered as  
723 “non-additive”.

724

725



726 **Data Access**

727 All raw data has been deposited to EMBL-EBI hosted ArrayExpress, accession numbers:  
728 E-MTAB-8877 (gDNA), E-MTAB-8878 (RNA-seq), E-MTAB-8879 (ATAC-seq), E-MTAB-  
729 8880 (ChIP-seq H3K4me3, H3K27ac). Processed data, including total counts, allelic ratios,  
730 cis/trans estimates, estimated per-feature heritability, mappability filters, and parental genotype  
731 files can all be downloaded from <http://furlonglab.embl.de/data>

732

733 **Acknowledgements**

734 We are very grateful to members of the Furlong lab for discussions and comments, in particular to  
735 Olga Sigalova, Adam Rabinowitz, Marijn van Jaarsveld and Matteo Perino. This work was  
736 technically supported by the EMBL Genomics Core Facility and the public resources of FlyBase,  
737 BDGP, and RedFly. The work was financially supported by the European Research Council  
738 (ERC advanced grant) agreement 322851 (CisRegVar) and 787611 (DeCRyPT) to E.E.F.

739

740 **Author Contributions**

741 EF, DG, and BZ conceived the project. BZ developed the ATAC-seq and RRV the iChIP protocol  
742 for *Drosophila* embryos. BZ and RRV generated the data with help from DG. DG, SF, and EW  
743 performed data analysis. DG and SF performed mapping bias analysis and allelic and total count  
744 data processing. SF performed partial correlation analysis, and EW the statistical modeling for  
745 allelic imbalance and Copula analysis. DG and EW performed cis/trans analysis. DG performed  
746 analysis of heritability and evolutionary variation. EF, DG, EW, BZ and SF wrote the manuscript  
747 with input from all authors. MT and DF helped to revise the manuscript.

748

749 **Disclosure Declaration**

750 The authors have no financial stake or conflicts of interest with the reported research.

## 751 **References**

- 752 Ahituv N, Zhu Y, Visel A, Holt A, Afzal V, Pennacchio LA, Rubin EM. 2007. Deletion of ultraconserved  
753 elements yields viable mice. *PLoS Biol* **5**: e234.
- 754 Battlay P, Schmidt JM, Fournier-Level A, Robin C. 2016. Genomic and Transcriptomic Associations  
755 Identify a New Insecticide Resistance Phenotype for the Selective Sweep at the Cyp6g1 Locus of  
756 *Drosophila melanogaster*. *G3 (Bethesda)* **6**: 2573-2581.
- 757 Battle A, Khan Z, Wang SH, Mitrano A, Ford MJ, Pritchard JK, Gilad Y. 2015. Genomic variation.  
758 Impact of regulatory variation from RNA to protein. *Science* **347**: 664-667.
- 759 Behera V, Evans P, Face CJ, Hamagami N, Sankaranarayanan L, Keller CA, Giardine B, Tan K, Hardison  
760 RC, Shi J et al. 2018. Exploiting genetic variation to uncover rules of transcription factor binding  
761 and chromatin accessibility. *Nat Commun* **9**: 782.
- 762 Benjamini Y, and Hochberg, Y. 1995. Controlling the False Discovery Rate: A Practical and Powerful  
763 Approach to Multiple Testing. *Journal of the Royal Statistical Society: Series B (Methodological)*  
764 **57**: 289-300.
- 765 Berger RLaH, Jason C. 1996. Bioequivalence trials, intersection-union tests and equivalence confidence  
766 sets. *Statistical Science* **11**: 283-302.
- 767 Bonn S, Zinzen RP, Girardot C, Gustafson EH, Perez-Gonzalez A, Delhomme N, Ghavi-Helm Y,  
768 Wilczynski B, Riddell A, Furlong EE. 2012. Tissue-specific analysis of chromatin state identifies  
769 temporal signatures of enhancer activity during embryonic development. *Nat Genet* **44**: 148-156.
- 770 Borok MJ, Tran DA, Ho MC, Drewell RA. 2010. Dissecting the regulatory switches of development:  
771 lessons from enhancer evolution in *Drosophila*. *Development* **137**: 5-13.
- 772 Brown CD, Johnson DS, Sidow A. 2007. Functional architecture and evolution of transcriptional elements  
773 that drive gene coexpression. *Science* **317**: 1557-1560.
- 774 Buenrostro JD, Giresi PG, Zaba LC, Chang HY, Greenleaf WJ. 2013. Transposition of native chromatin  
775 for fast and sensitive epigenomic profiling of open chromatin, DNA-binding proteins and  
776 nucleosome position. *Nat Methods* **10**: 1213-1218.
- 777 Bullaughey K. 2011. Changes in selective effects over time facilitate turnover of enhancer sequences.  
778 *Genetics* **187**: 567-582.
- 779 Cannavo E, Khoueiry P, Garfield DA, Geeleher P, Zichner T, Gustafson EH, Ciglar L, Korbel JO,  
780 Furlong EE. 2016. Shadow Enhancers Are Pervasive Features of Developmental Regulatory  
781 Networks. *Curr Biol* **26**: 38-51.
- 782 Cannavo E, Koelling N, Harnett D, Garfield D, Casale FP, Ciglar L, Gustafson HE, Viales RR, Marco-  
783 Ferreres R, Degner JF et al. 2017. Genetic variants regulating expression levels and isoform  
784 diversity during embryogenesis. *Nature* **541**: 402-406.
- 785 Celniker SE, Dillon LA, Gerstein MB, Gunsalus KC, Henikoff S, Karpen GH, Kellis M, Lai EC, Lieb JD,  
786 MacAlpine DM et al. 2009. Unlocking the secrets of the genome. *Nature* **459**: 927-930.
- 787 Chen L, Ge B, Casale FP, Vasquez L, Kwan T, Garrido-Martin D, Watt S, Yan Y, Kundu K, Ecker S et  
788 al. 2016. Genetic Drivers of Epigenetic and Transcriptional Variation in Human Immune Cells.  
789 *Cell* **167**: 1398-1414 e1324.
- 790 Clouaire T, Webb S, Bird A. 2014. Cfp1 is required for gene expression-dependent H3K4 trimethylation  
791 and H3K9 acetylation in embryonic stem cells. *Genome Biol* **15**: 451.
- 792 Clouaire T, Webb S, Skene P, Illingworth R, Kerr A, Andrews R, Lee JH, Skalnik D, Bird A. 2012. Cfp1  
793 integrates both CpG content and gene activity for accurate H3K4me3 deposition in embryonic  
794 stem cells. *Genes Dev* **26**: 1714-1728.

- 795 Conrad T, Cavalli FM, Vaquerizas JM, Luscombe NM, Akhtar A. 2012. *Drosophila* dosage compensation  
796 involves enhanced Pol II recruitment to male X-linked promoters. *Science* **337**: 742-746.
- 797 Core LJ, Waterfall JJ, Gilchrist DA, Fargo DC, Kwak H, Adelman K, Lis JT. 2012. Defining the status of  
798 RNA polymerase at promoters. *Cell Rep* **2**: 1025-1035.
- 799 Cretekos CJ, Wang Y, Green ED, Martin JF, Rasweiler JJ, Behringer RR. 2008. Regulatory divergence  
800 modifies limb length between mammals. *Genes Dev* **22**: 141-151.
- 801 Cusanovich DA, Reddington JP, Garfield DA, Daza RM, Aghamirzaie D, Marco-Ferrerres R, Pliner HA,  
802 Christiansen L, Qiu X, Steemers FJ et al. 2018. The cis-regulatory dynamics of embryonic  
803 development at single-cell resolution. *Nature* **555**: 538-542.
- 804 Daborn P, Boundy S, Yen J, Pittendrigh B, French-Constant R. 2001. DDT resistance in *Drosophila*  
805 correlates with *Cyp6g1* over-expression and confers cross-resistance to the neonicotinoid  
806 imidacloprid. *Mol Genet Genomics* **266**: 556-563.
- 807 Dobin A, Davis CA, Schlesinger F, Drenkow J, Zaleski C, Jha S, Batut P, Chaisson M, Gingeras TR.  
808 2013. STAR: ultrafast universal RNA-seq aligner. *Bioinformatics* **29**: 15-21.
- 809 Doitsidou M, Flames N, Topalidou I, Abe N, Felton T, Remesal L, Popovitchenko T, Mann R, Chalfie M,  
810 Hobert O. 2013. A combinatorial regulatory signature controls terminal differentiation of the  
811 dopaminergic nervous system in *C. elegans*. *Genes Dev* **27**: 1391-1405.
- 812 Epstein DJ. 2009. Cis-regulatory mutations in human disease. *Brief Funct Genomic Proteomic* **8**: 310-  
813 316.
- 814 Frankel N, Davis GK, Vargas D, Wang S, Payre F, Stern DL. 2010. Phenotypic robustness conferred by  
815 apparently redundant transcriptional enhancers. *Nature* **466**: 490-493.
- 816 Garfield DA, Runcie DE, Babbitt CC, Haygood R, Nielsen WJ, Wray GA. 2013. The impact of gene  
817 expression variation on the robustness and evolvability of a developmental gene regulatory  
818 network. *PLoS Biol* **11**: e1001696.
- 819 Georgiev P, Chlamydas S, Akhtar A. 2011. *Drosophila* dosage compensation: males are from Mars,  
820 females are from Venus. *Fly (Austin)* **5**: 147-154.
- 821 Ghavi-Helm Y, Jankowski A, Meiers S, Viales RR, Korbel JO, Furlong EEM. 2019. Highly rearranged  
822 chromosomes reveal uncoupling between genome topology and gene expression. *Nat Genet* **51**:  
823 1272-1282.
- 824 Gibson G, Dworkin I. 2004. Uncovering cryptic genetic variation. *Nat Rev Genet* **5**: 681-690.
- 825 Goncalves A, Leigh-Brown S, Thybert D, Stefflova K, Turro E, Flicek P, Brazma A, Odom DT, Marioni  
826 JC. 2012. Extensive compensatory cis-trans regulation in the evolution of mouse gene expression.  
827 *Genome Res* **22**: 2376-2384.
- 828 Hong JW, Hendrix DA, Levine MS. 2008. Shadow enhancers as a source of evolutionary novelty. *Science*  
829 **321**: 1314.
- 830 Howe FS, Fischl H, Murray SC, Mellor J. 2017. Is H3K4me3 instructive for transcription activation?  
831 *Bioessays* **39**: 1-12.
- 832 John S, Sabo PJ, Thurman RE, Sung MH, Biddie SC, Johnson TA, Hager GL, Stamatoyannopoulos JA.  
833 2011. Chromatin accessibility pre-determines glucocorticoid receptor binding patterns. *Nat Genet*  
834 **43**: 264-268.
- 835 Junion G, Spivakov M, Girardot C, Braun M, Gustafson EH, Birney E, Furlong EE. 2012. A transcription  
836 factor collective defines cardiac cell fate and reflects lineage history. *Cell* **148**: 473-486.
- 837 Karlic R, Chung HR, Lasserre J, Vlahovicek K, Vingron M. 2010. Histone modification levels are  
838 predictive for gene expression. *Proc Natl Acad Sci U S A* **107**: 2926-2931.

- 839 Kasowski M, Grubert F, Heffelfinger C, Hariharan M, Asabere A, Waszak SM, Habegger L, Rozowsky J,  
840 Shi M, Urban AE et al. 2010. Variation in transcription factor binding among humans. *Science*  
841 **328**: 232-235.
- 842 Kheradpour P, Ernst J, Melnikov A, Rogov P, Wang L, Zhang X, Alston J, Mikkelsen TS, Kellis M.  
843 2013. Systematic dissection of regulatory motifs in 2000 predicted human enhancers using a  
844 massively parallel reporter assay. *Genome Res* **23**: 800-811.
- 845 Khoueiry P, Girardot C, Ciglar L, Peng PC, Gustafson EH, Sinha S, Furlong EE. 2017. Uncoupling  
846 evolutionary changes in DNA sequence, transcription factor occupancy and enhancer activity.  
847 *Elife* **6**: e28440.
- 848 Kilpinen H, Waszak SM, Gschwind AR, Raghav SK, Witwicki RM, Orioli A, Migliavacca E, Wiederkehr  
849 M, Gutierrez-Arcelus M, Panousis NI et al. 2013. Coordinated effects of sequence variation on  
850 DNA binding, chromatin structure, and transcription. *Science* **342**: 744-747.
- 851 Kim JM, Jung YS, Sungur EA, Han KH, Park C, Sohn I. 2008. A copula method for modeling directional  
852 dependence of genes. *BMC Bioinformatics* **9**: 225.
- 853 Kircher M, Xiong C, Martin B, Schubach M, Inoue F, Bell RJA, Costello JF, Shendure J, Ahituv N. 2019.  
854 Saturation mutagenesis of twenty disease-associated regulatory elements at single base-pair  
855 resolution. *Nat Commun* **10**: 3583.
- 856 Knowles DA, Davis JR, Edgington H, Raj A, Fave MJ, Zhu X, Potash JB, Weissman MM, Shi J,  
857 Levinson DF et al. 2017. Allele-specific expression reveals interactions between genetic variation  
858 and environment. *Nat Methods* **14**: 699-702.
- 859 Kvon EZ, Kazmar T, Stampfel G, Yanez-Cuna JO, Pagani M, Schernhuber K, Dickson BJ, Stark A. 2014.  
860 Genome-scale functional characterization of *Drosophila* developmental enhancers in vivo. *Nature*  
861 **512**: 91-95.
- 862 Kwasniewski JC, Fiore C, Chaudhari HG, Cohen BA. 2014. High-throughput functional testing of  
863 ENCODE segmentation predictions. *Genome Res* **24**: 1595-1602.
- 864 Landry CR, Wittkopp PJ, Taubes CH, Ranz JM, Clark AG, Hartl DL. 2005. Compensatory cis-trans  
865 evolution and the dysregulation of gene expression in interspecific hybrids of *Drosophila*.  
866 *Genetics* **171**: 1813-1822.
- 867 Lara-Astiaso D, Weiner A, Lorenzo-Vivas E, Zaretsky I, Jaitin DA, David E, Keren-Shaul H, Mildner A,  
868 Winter D, Jung S et al. 2014. Immunogenetics. Chromatin state dynamics during blood formation.  
869 *Science* **345**: 943-949.
- 870 Lasserre J, Chung HR, Vingron M. 2013. Finding associations among histone modifications using sparse  
871 partial correlation networks. *PLoS Comput Biol* **9**: e1003168.
- 872 Lee N, Kim JM. 2019. Copula directional dependence for inference and statistical analysis of whole-brain  
873 connectivity from fMRI data. *Brain Behav* **9**: e01191.
- 874 Lemos B, Araripe LO, Fontanillas P, Hartl DL. 2008. Dominance and the evolutionary accumulation of  
875 cis- and trans-effects on gene expression. *Proc Natl Acad Sci U S A* **105**: 14471-14476.
- 876 Li H, Durbin R. 2010. Fast and accurate long-read alignment with Burrows-Wheeler transform.  
877 *Bioinformatics* **26**: 589-595.
- 878 Long HK, Prescott SL, Wysocka J. 2016. Ever-Changing Landscapes: Transcriptional Enhancers in  
879 Development and Evolution. *Cell* **167**: 1170-1187.
- 880 Love MI, Huber W, Anders S. 2014. Moderated estimation of fold change and dispersion for RNA-seq  
881 data with DESeq2. *Genome Biol* **15**: 550.
- 882 Lowe WL, Jr., Reddy TE. 2015. Genomic approaches for understanding the genetics of complex disease.  
883 *Genome Res* **25**: 1432-1441.

- 884 Lu R, Rogan PK. 2018. Transcription factor binding site clusters identify target genes with similar tissue-  
885 wide expression and buffer against mutations. *F1000Res* **7**: 1933.
- 886 Lucchesi JC, Kuroda MI. 2015. Dosage compensation in *Drosophila*. *Cold Spring Harb Perspect Biol* **7**:  
887 a019398.
- 888 Lynch M, Walsh B. 1998. *Genetics and analysis of quantitative traits*. Sinauer, Sunderland, Mass.
- 889 Mackay TF, Richards S, Stone EA, Barbadilla A, Ayroles JF, Zhu D, Casillas S, Han Y, Magwire MM,  
890 Cridland JM et al. 2012. The *Drosophila melanogaster* Genetic Reference Panel. *Nature* **482**: 173-  
891 178.
- 892 Margaritis T, Oreal V, Brabers N, Maestroni L, Vitaliano-Prunier A, Benschop JJ, van Hooff S, van  
893 Leenen D, Dargemont C, Geli V et al. 2012. Two distinct repressive mechanisms for histone 3  
894 lysine 4 methylation through promoting 3'-end antisense transcription. *PLoS Genet* **8**: e1002952.
- 895 Meiklejohn CD, Coolon JD, Hartl DL, Wittkopp PJ. 2014. The roles of cis- and trans-regulation in the  
896 evolution of regulatory incompatibilities and sexually dimorphic gene expression. *Genome Res*  
897 **24**: 84-95.
- 898 Mi H, Vandergriff J, Campbell M, Narechania A, Majoros W, Lewis S, Thomas PD, Ashburner M. 2003.  
899 Assessment of genome-wide protein function classification for *Drosophila melanogaster*. *Genome*  
900 *Res* **13**: 2118-2128.
- 901 Mikhaylichenko O, Bondarenko V, Harnett D, Schor IE, Males M, Viales RR, Furlong EEM. 2018. The  
902 degree of enhancer or promoter activity is reflected by the levels and directionality of eRNA  
903 transcription. *Genes Dev* **32**: 42-57.
- 904 Montavon T, Soshnikova N, Mascrez B, Joye E, Thevenet L, Splinter E, de Laat W, Spitz F, Duboule D.  
905 2011. A regulatory archipelago controls Hox genes transcription in digits. *Cell* **147**: 1132-1145.
- 906 Moyerbrailean GA, Richards AL, Kurtz D, Kalita CA, Davis GO, Harvey CT, Alazizi A, Watza D,  
907 Sorokin Y, Hauff N et al. 2016. High-throughput allele-specific expression across 250  
908 environmental conditions. *Genome Res* **26**: 1627-1638.
- 909 Opgen-Rhein R, Strimmer K. 2007. From correlation to causation networks: a simple approximate  
910 learning algorithm and its application to high-dimensional plant gene expression data. *BMC Syst*  
911 *Biol* **1**: 37.
- 912 Paaby AB, Gibson G. 2016. Cryptic Genetic Variation in Evolutionary Developmental Genetics. *Biology*  
913 *(Basel)* **5**: E28.
- 914 Pai AA, Pritchard JK, Gilad Y. 2015. The genetic and mechanistic basis for variation in gene regulation.  
915 *PLoS Genet* **11**: e1004857.
- 916 Pal K, Forcato M, Jost D, Sexton T, Vaillant C, Salviato E, Mazza EMC, Lugli E, Cavalli G, Ferrari F.  
917 2019. Global chromatin conformation differences in the *Drosophila* dosage compensated  
918 chromosome X. *Nat Commun* **10**: 5355.
- 919 Pradeepa MM, Grimes GR, Kumar Y, Olley G, Taylor GC, Schneider R, Bickmore WA. 2016. Histone  
920 H3 globular domain acetylation identifies a new class of enhancers. *Nat Genet* **48**: 681-686.
- 921 Reddy TE, Gertz J, Pauli F, Kucera KS, Varley KE, Newberry KM, Marinov GK, Mortazavi A, Williams  
922 BA, Song L et al. 2012. Effects of sequence variation on differential allelic transcription factor  
923 occupancy and gene expression. *Genome Res* **22**: 860-869.
- 924 Robinson MD, McCarthy DJ, Smyth GK. 2010. edgeR: a Bioconductor package for differential  
925 expression analysis of digital gene expression data. *Bioinformatics* **26**: 139-140.
- 926 Schneider RF, Meyer A. 2017. How plasticity, genetic assimilation and cryptic genetic variation may  
927 contribute to adaptive radiations. *Mol Ecol* **26**: 330-350.



- 928 Schor IE, Degner JF, Harnett D, Cannavo E, Casale FP, Shim H, Garfield DA, Birney E, Stephens M,  
929 Stegle O et al. 2017. Promoter shape varies across populations and affects promoter evolution and  
930 expression noise. *Nat Genet* **49**: 550-558.
- 931 Spitz F, Furlong EE. 2012. Transcription factors: from enhancer binding to developmental control. *Nat*  
932 *Rev Genet* **13**: 613-626.
- 933 Spivakov M, Akhtar J, Kheradpour P, Beal K, Girardot C, Koscielny G, Herrero J, Kellis M, Furlong EE,  
934 Birney E. 2012. Analysis of variation at transcription factor binding sites in *Drosophila* and  
935 humans. *Genome Biol* **13**: R49.
- 936 Starz-Gaiano M, Cho NK, Forbes A, Lehmann R. 2001. Spatially restricted activity of a *Drosophila* lipid  
937 phosphatase guides migrating germ cells. *Development* **128**: 983-991.
- 938 Tirosh I, Reikhav S, Levy AA, Barkai N. 2009. A yeast hybrid provides insight into the evolution of gene  
939 expression regulation. *Science* **324**: 659-662.
- 940 Turner LM, Chuong EB, Hoekstra HE. 2008. Comparative analysis of testis protein evolution in rodents.  
941 *Genetics* **179**: 2075-2089.
- 942 Uhl JD, Zandvakili A, Gebelein B. 2016. A Hox Transcription Factor Collective Binds a Highly  
943 Conserved Distal-less cis-Regulatory Module to Generate Robust Transcriptional Outcomes.  
944 *PLoS Genet* **12**: e1005981.
- 945 Urban J, Kuzu G, Bowman S, Scruggs B, Henriques T, Kingston R, Adelman K, Tolstorukov M,  
946 Larschan E. 2017. Enhanced chromatin accessibility of the dosage compensated *Drosophila* male  
947 X-chromosome requires the CLAMP zinc finger protein. *PLoS One* **12**: e0186855.
- 948 Villar D, Berthelot C, Aldridge S, Rayner TF, Lukk M, Pignatelli M, Park TJ, Deaville R, Erichsen JT,  
949 Jasinska AJ et al. 2015. Enhancer evolution across 20 mammalian species. *Cell* **160**: 554-566.
- 950 Waszak SM, Delaneau O, Gschwind AR, Kilpinen H, Raghav SK, Witwicki RM, Orioli A, Wiederkehr  
951 M, Panousis NI, Yurovsky A et al. 2015. Population Variation and Genetic Control of Modular  
952 Chromatin Architecture in Humans. *Cell* **162**: 1039-1050.
- 953 Waymack RF, A.; Enciso, G.; Wunderlich, Z. . 2019. Shadow enhancers suppress input transcription  
954 factor noise through distinct regulatory logic. *bioRxiv* doi:10.1101/778092.
- 955 Wittkopp PJ, Haerum BK, Clark AG. 2004. Evolutionary changes in cis and trans gene regulation. *Nature*  
956 **430**: 85-88.
- 957 Wittkopp PJ, Kalay G. 2011. Cis-regulatory elements: molecular mechanisms and evolutionary processes  
958 underlying divergence. *Nat Rev Genet* **13**: 59-69.
- 959 Wong ES, Schmitt BM, Kazachenka A, Thybert D, Redmond A, Connor F, Rayner TF, Feig C, Ferguson-  
960 Smith AC, Marioni JC et al. 2017. Interplay of cis and trans mechanisms driving transcription  
961 factor binding and gene expression evolution. *Nat Commun* **8**: 1092.
- 962 Xiong N, Kang C, Raulet DH. 2002. Redundant and unique roles of two enhancer elements in the  
963 TCRgamma locus in gene regulation and gammadelta T cell development. *Immunity* **16**: 453-463.
- 964 Yadav A, Dhole K, Sinha H. 2016. Differential Regulation of Cryptic Genetic Variation Shapes the  
965 Genetic Interactome Underlying Complex Traits. *Genome Biol Evol* **8**: 3559-3573.
- 966 Zabidi MA, Arnold CD, Schernhuber K, Pagani M, Rath M, Frank O, Stark A. 2015. Enhancer-core-  
967 promoter specificity separates developmental and housekeeping gene regulation. *Nature* **518**:  
968 556-559.
- 969 Zhang Y, Liu T, Meyer CA, Eeckhoutte J, Johnson DS, Bernstein BE, Nusbaum C, Myers RM, Brown M,  
970 Li W et al. 2008. Model-based analysis of CHIP-Seq (MACS). *Genome Biol* **9**: R137.
- 971 Zheng J, Payne JL, Wagner A. 2019. Cryptic genetic variation accelerates evolution by opening access to  
972 diverse adaptive peaks. *Science* **365**: 347-353.



- 973 Zheng W, Zhao H, Mancera E, Steinmetz LM, Snyder M. 2010. Genetic analysis of variation in  
974 transcription factor binding in yeast. *Nature* **464**: 1187-1191.
- 975 Zhu J, Sanborn JZ, Diekhans M, Lowe CB, Pringle TH, Haussler D. 2007. Comparative genomics search  
976 for losses of long-established genes on the human lineage. *PLoS Comput Biol* **3**: e247.
- 977 Zinzen RP, Girardot C, Gagneur J, Braun M, Furlong EE. 2009. Combinatorial binding predicts spatio-  
978 temporal cis-regulatory activity. *Nature* **462**: 65-70.
- 979
